# Supplementary material
Source: PubMed Central journal article supplement (PMC2667091)
Supplement: 0812722106_0812722106SI.pdf [file 0812722106_0812722106SI.pdf]

# Supporting Information

Mansouri-Attia et al. 10.1073/pnas.0812722106

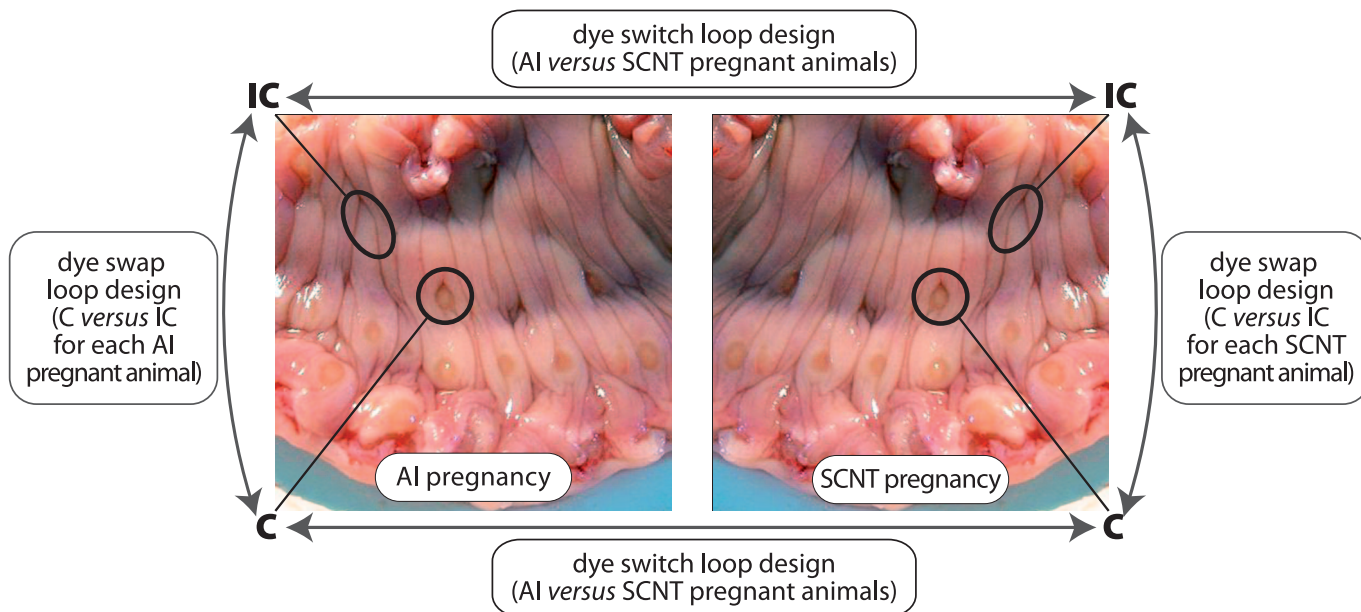

**Fig. S1.** Caruncles (C) and intercaruncular areas (IC) are presented on photomicrographs of a typical bovine endometrium at day 20 of pregnancy (implantation). The C areas from AI pregnant animals were compared to the C areas from SCNT pregnant animals using a dye-switch loop. The same design was used for the IC areas. For each pregnant animal (AI or SCNT), a paired comparison of the C versus IC areas was carried out using a dye-swap loop design. Similar procedures were used for comparing the AI to the IVF-ET pregnancies.

## Other Supporting Information Files

- [Table S1](#)
- [Table S2](#)
- [Table S3](#)
- [Table S4](#)
- [Table S5](#)
- [Table S6](#)
- [Table S7](#)
- [Table S8](#)
