# Supplementary material
Source: PubMed Central journal article supplement (PMC2667091)
Supplement: 0812722106_ST1_PDF.pdf [file 0812722106_ST1_PDF.pdf]

**Table 1.** Top list of genes showing the highest expression level in the AI vs. IVF-ET profile in bovine caruncular endometrium

| <b>Top list of the 100 most regulated genes in the [AI vs. IVF-ET] profiles in caruncles</b> |                   |                                                                                             |                           |                          |                  |                 |                  |              |           |
|----------------------------------------------------------------------------------------------|-------------------|---------------------------------------------------------------------------------------------|---------------------------|--------------------------|------------------|-----------------|------------------|--------------|-----------|
| <b>Gene accession N°</b>                                                                     | <b>Unigene ID</b> | <b>Bovine gene name</b>                                                                     | <b>Bovine gene symbol</b> | <b>Human gene symbol</b> | <b>Log ratio</b> | <b>variance</b> | <b>stat.test</b> | <b>group</b> | <b>BH</b> |
| BM361913                                                                                     | Hs.181244         | MHC Class I JSP.1                                                                           | JSP.1                     | HLA-A                    | 1.5119           | 0.1382          | -3.8177          | 3            | 0.1382    |
| CR453977                                                                                     | Hs.639            | calbindin 3, (vitamin D-dependent calcium binding protein)                                  | CALB3                     | S100G                    | -0.9995          | 0.1370          | 4.4243           | 3            | 0.1370    |
| CN433519                                                                                     | Hs.446574         | thymosin, beta 10                                                                           | TMSB10                    | TMSB10                   | -0.7867          | 0.0455          | -5.0322          | 4            | 0.0455    |
| AW466018                                                                                     | Hs.155097         | carbonic anhydrase II                                                                       | CA2                       | CA2                      | 0.6815           | 0.1382          | -4.1700          | 3            | 0.1382    |
| CR456021                                                                                     | Hs.644618         | solute carrier family 25 (mitochondrial carrier; adenine nucleotide translocator), member 5 | SLC25A5                   | SLC25A5                  | 0.6263           | 0.1199          | -4.9293          | 3            | 0.1199    |
| BF042057                                                                                     | Hs.591967         | similar to interleukin-18 binding protein                                                   | LOC617470                 | IL18BP                   | -0.5509          | 0.0908          | -5.7304          | 3            | 0.0908    |
| AW465810                                                                                     | Hs.645068         | zinc finger protein 36, C3H type-like 2                                                     | ZFP36L2                   | ZFP36L2                  | 0.5043           | 0.1382          | 6.6847           | 2            | 0.1382    |
| CN440850                                                                                     | Hs.561411         | similar to Embigin homolog (mouse)                                                          | LOC785366                 | 0                        | 0.4918           | 0.0263          | 3.8447           | 4            | 0.0263    |
| X55389                                                                                       | Hs.271135         | ATP synthase, H+ transporting, mitochondrial F1 complex, gamma polypeptide 1                | ATP5C1                    | ATP5C1                   | 0.4726           | 0.0263          | 6.3848           | 3            | 0.0263    |
| AW464920                                                                                     | Hs.247916         | natriuretic peptide precursor C                                                             | NPPC                      | NPPC                     | -0.4441          | 0.1382          | -4.2772          | 3            | 0.1382    |
| CN441344                                                                                     | Hs.82045          | midkine (neurite growth-promoting factor 2)                                                 | MDK                       | MDK                      | 0.4371           | 0.1382          | -3.5405          | 3            | 0.1382    |
| BF044858                                                                                     | Hs.279529         | px19-like protein                                                                           | PX19                      | PRELID1                  | 0.4332           | 0.0516          | 5.7208           | 4            | 0.0516    |
| CN786320                                                                                     | Hs.494496         | fructose-1,6-bisphosphatase 2                                                               | FBP2                      | FBP1                     | 0.4209           | 0.1382          | -3.5025          | 3            | 0.1382    |
| BF046702                                                                                     | Hs.139389         | cystatin E/M                                                                                | CST6                      | CST6                     | 0.4138           | 0.1524          | -4.9752          | 2            | 0.1524    |
| CN433528                                                                                     | Hs.485262         | similar to mitochondrial carrier homolog 1                                                  | LOC781257                 | MTCH1                    | -0.3888          | 0.0327          | 7.2484           | 3            | 0.0327    |
| CN439210                                                                                     | Hs.524390         | similar to alpha-tubulin                                                                    | LOC407195                 | TUBA1A                   | -0.3663          | 0.0942          | 3.2287           | 4            | 0.0942    |
| NG010005A10G09                                                                               | Hs.474783         | thiosulfate sulfurtransferase (rhodanese)                                                   | TST                       | TST                      | -0.3565          | 0.1382          | 5.3617           | 2            | 0.1382    |
| AW267059                                                                                     | Hs.460558         | sulfotransferase family, cytosolic, 1A, phenol-preferring, member 1                         | SULT1A1                   | SULT1A4                  | 0.3535           | 0.1764          | 5.6652           | 1            | 0.1764    |

|                |           |                                                                                                                             |           |          |         |        |         |   |        |
|----------------|-----------|-----------------------------------------------------------------------------------------------------------------------------|-----------|----------|---------|--------|---------|---|--------|
| CR552920       | Hs.62886  | similar to SPARC-like protein 1 precursor (High endothelial venule protein) (Hevin) (MAST 9)                                | MGC127494 | SPARCL1  | 0.3502  | 0.1658 | -5.9905 | 1 | 0.1658 |
| BF041945       | Hs.644065 | similar to KIAA0669 protein                                                                                                 | LOC541277 | TSC22D2  | 0.3467  | 0.1382 | -3.9938 | 3 | 0.1382 |
| CN433809       | Hs.429    | ATP synthase, H+ transporting, mitochondrial F0 complex, subunit C3 (subunit 9)                                             | ATP5G3    | ATP5G3   | 0.3379  | 0.1204 | 4.7467  | 3 | 0.1204 |
| CR456010       | Hs.587979 | prostate tumor over expressed gene 1                                                                                        | PTOV1     | PTOV1    | -0.3345 | 0.1656 | 4.3817  | 2 | 0.1656 |
| CN441786       | Hs.518662 | Transcribed locus                                                                                                           | 0         | FAM129A  | 0.3221  | 0.1370 | -4.4749 | 3 | 0.1370 |
| BF045543       | Hs.74034  | caveolin 1, caveolae protein, 22kDa                                                                                         | CAV1      | CAV1     | -0.3198 | 0.1403 | -5.2184 | 2 | 0.1403 |
| CR453935       | Hs.521487 | similar to transmembrane protein 66                                                                                         | MGC139371 | TMEM66   | -0.3157 | 0.1382 | -5.5481 | 2 | 0.1382 |
| CB536391       | Hs.490817 | similar to VIP2 receptor                                                                                                    | LOC790124 | VIPR2    | -0.3053 | 0.1515 | -5.0248 | 2 | 0.1515 |
| BF039310       | Hs.428214 | 0                                                                                                                           | 0         | MAML2    | -0.3036 | 0.1382 | -6.5624 | 2 | 0.1382 |
| AW464441       | Hs.290404 | solute carrier family 25 (mitochondrial carrier; phosphate carrier), member 3                                               | SLC25A3   | SLC25A3  | 0.3002  | 0.1382 | 4.3232  | 3 | 0.1382 |
| BF046620       | Hs.25338  | hypothetical LOC538575                                                                                                      | MGC139156 | PRSS23   | -0.2979 | 0.1676 | 4.0261  | 2 | 0.1676 |
| BM364565       | Hs.445129 | hypothetical LOC510651                                                                                                      | LOC510651 | C12orf35 | 0.2966  | 0.0770 | 3.6503  | 4 | 0.0770 |
| CN435672       | Hs.615223 | hypothetical LOC618459                                                                                                      | LOC618459 | FAM101B  | 0.2933  | 0.1658 | -4.2187 | 2 | 0.1658 |
| CR452973       | Hs.127897 | similar to Rap guanine nucleotide exchange factor (GEF) 1                                                                   | LOC520454 | RAPGEF1  | -0.2884 | 0.1403 | 5.2482  | 2 | 0.1403 |
| AW465340       | Hs.373550 | similar to TG-interacting factor                                                                                            | LOC510050 | TGIF1    | 0.2842  | 0.0353 | 4.6058  | 4 | 0.0353 |
| CN441335       | Hs.76884  | inhibitor of DNA binding 3                                                                                                  | ID3       | ID3      | -0.2829 | 0.1382 | -3.6488 | 3 | 0.1382 |
| NG010006B21A01 | Hs.199763 | Transcribed locus                                                                                                           | 0         | SSH1     | -0.2790 | 0.0263 | 3.9925  | 4 | 0.0263 |
| BF042291       | Mm.103246 | hypothetical protein LOC782395                                                                                              | LOC782395 | Mfhas1   | 0.2745  | 0.0722 | 3.5422  | 6 | 0.0722 |
| BF042780       | Hs.488835 | similar to transmembrane protein induced by tumor necrosis factor alpha                                                     | LOC520173 | TMPIT    | -0.2731 | 0.1619 | -4.5821 | 2 | 0.1619 |
| NG010008A10G02 | Hs.200100 | hypothetical LOC615685                                                                                                      | LOC615685 | C7orf41  | -0.2710 | 0.1619 | -4.4658 | 2 | 0.1619 |
| BF045597       | Hs.172772 | Transcribed locus, weakly similar to XP_578119.2 similar to transcription elongation factor B (SIII), polypeptide 2 [Rattus | 0         | TCEB2    | -0.2705 | 0.1382 | -3.9613 | 3 | 0.1382 |

|                |           |                                                                                                   |           |          |         |        |         |   |        |
|----------------|-----------|---------------------------------------------------------------------------------------------------|-----------|----------|---------|--------|---------|---|--------|
|                |           | norvegicus]                                                                                       |           |          |         |        |         |   |        |
| AW465707       | Hs.522789 | similar to mammalian retrotransposon derived 8b                                                   | MGC140692 | FAM127A  | -0.2688 | 0.1382 | -4.2503 | 3 | 0.1382 |
| CN434811       | Hs.631602 | similar to nucleobindin 1                                                                         | MGC143428 | NUCB1    | -0.2679 | 0.1619 | -4.5544 | 2 | 0.1619 |
| BF041910       | Hs.460468 | similar to exportin 6                                                                             | LOC510797 | XPO6     | 0.2642  | 0.1134 | 5.1092  | 3 | 0.1134 |
| CR553375       | Hs.134296 | similar to Deleted in liver cancer 1                                                              | LOC511433 | DLC1     | -0.2590 | 0.1619 | 4.4717  | 2 | 0.1619 |
| BF040173       | Hs.550155 | similar to Ankyrin repeat domain-containing protein 13B                                           | LOC616514 | ANKRD13B | 0.2576  | 0.0263 | -4.0568 | 4 | 0.0263 |
| NG010008A20G04 | Hs.210891 | similar to TBC1 domain family, member 4                                                           | LOC534649 | TBC1D4   | 0.2521  | 0.1382 | -3.3009 | 3 | 0.1382 |
| AW462339       | Hs.592048 | Ubiquinol-cytochrome c reductase core protein II                                                  | UQCRC2    | UQCRC2   | 0.2508  | 0.1764 | -3.9104 | 2 | 0.1764 |
| CR453487       | Hs.417004 | S100 calcium binding protein A11 (calgizzarin)                                                    | S100A11   | S100A11  | -0.2476 | 0.1515 | 3.1374  | 3 | 0.1515 |
| NM_173982      | Hs.652217 | advanced glycosylation end product-specific receptor                                              | AGER      | AGER     | -0.2399 | 0.1619 | -6.4562 | 1 | 0.1619 |
| BCAZ0017eo21   | 0         | 0                                                                                                 | 0         | 0        | 0.2386  | 0.0999 | 5.1617  | 3 | 0.0999 |
| BF044376       | Hs.567328 | similar to Rab5B                                                                                  | LOC539150 | RAB5B    | -0.2377 | 0.1515 | 5.0578  | 2 | 0.1515 |
| CN441812       | Hs.482587 | similar to Secretory carrier-associated membrane protein 1 (Secretory carrier membrane protein 1) | LOC535352 | SCAMP1   | 0.2367  | 0.0737 | 3.7800  | 4 | 0.0737 |
| CR452523       | Hs.410596 | Transcribed locus                                                                                 | 0         | WDR68    | -0.2359 | 0.1382 | 5.5658  | 2 | 0.1382 |
| CR551679       | Hs.458332 | pyrroline-5-carboxylate reductase 1                                                               | PYCR1     | PYCR1    | -0.2326 | 0.0263 | 6.9646  | 3 | 0.0263 |
| CN438842       | Hs.643279 | Transcribed locus                                                                                 | 0         | EIF4EBP2 | -0.2321 | 0.1382 | 3.6951  | 3 | 0.1382 |
| CN441754       | Hs.309641 | RING finger protein 11                                                                            | RNF11     | RNF11    | 0.2280  | 0.1417 | 3.2677  | 3 | 0.1417 |
| CR455706       | Hs.126497 | similar to AE binding protein 2                                                                   | MGC142819 | AEBP2    | 0.2231  | 0.1204 | -4.7134 | 3 | 0.1204 |
| AW464058       | Hs.530291 | annexin A11                                                                                       | ANXA11    | ANXA11   | -0.2219 | 0.1382 | 6.9761  | 2 | 0.1382 |
| AW462229       | Hs.5333   | Transcribed locus                                                                                 | 0         | KBTBD11  | 0.2151  | 0.1382 | -4.3906 | 3 | 0.1382 |
| AW267074       | Hs.652329 | LAG1 homolog, ceramide synthase 2 (S. cerevisiae)                                                 | LASS2     | LASS2    | -0.2136 | 0.1608 | 4.6450  | 2 | 0.1608 |

|                |           |                                                                                         |           |               |         |        |         |   |        |
|----------------|-----------|-----------------------------------------------------------------------------------------|-----------|---------------|---------|--------|---------|---|--------|
| CN439691       | Hs.530904 | cysteine and glycine-rich protein 2                                                     | CSRP2     | CSRP2         | -0.2119 | 0.1620 | -4.4174 | 2 | 0.1620 |
| CR455904       | Hs.534333 | similar to NADH dehydrogenase                                                           | LOC785629 | NDUFA2        | -0.2115 | 0.1382 | -5.4580 | 2 | 0.1382 |
| AW465346       | Hs.105134 | similar to CHCR                                                                         | LOC540550 | MBNL3         | 0.1996  | 0.0941 | -5.3990 | 3 | 0.0941 |
| CN442418       | Bt.45855  | similar to fibroblast growth factor 9                                                   | LOC613731 | LOC613731     | 0.1975  | 0.1382 | 5.6127  | 2 | 0.1382 |
| BM363499       | Hs.514821 | chemokine (C-C motif) ligand 5                                                          | CCL5      | CCL5          | -0.1965 | 0.1524 | -3.1162 | 3 | 0.1524 |
| CN432898       | Hs.501140 | similar to KIAA1598 protein                                                             | LOC532603 | KIAA1598      | -0.1948 | 0.1382 | 3.6962  | 3 | 0.1382 |
| CN439268       | Hs.533613 | troponin T type 2 (cardiac)                                                             | TNNT2     | TNNT2         | 0.1945  | 0.0722 | -7.1856 | 4 | 0.0722 |
| CN433434       | Hs.164853 | similar to ubiquitin-conjugating enzyme UbcH6                                           | LOC615599 | UBE2E1        | 0.1941  | 0.1619 | 4.5649  | 2 | 0.1619 |
| BP240034B20G10 | Mm.27620  | similar to SMF protein                                                                  | LOC509419 | A630042L21Rik | -0.1936 | 0.1561 | 6.7870  | 1 | 0.1561 |
| AV597541       | Hs.432752 | similar to KIAA1513 protein                                                             | LOC539790 | POGK          | -0.1916 | 0.1619 | -4.6216 | 2 | 0.1619 |
| BF044278       | Hs.471768 | similar to SINK-homologous serine/threonine kinase                                      | MGC139116 | STK40         | 0.1909  | 0.0942 | -5.2545 | 3 | 0.0942 |
| CR454066       | Hs.445387 | Transcribed locus                                                                       | 0         | RPS6KA3       | 0.1901  | 0.1656 | 4.3958  | 2 | 0.1656 |
| CK773418       | Hs.441072 | similar to DNA-directed RNA polymerase II 7.6 kDa polypeptide (RPB10) (RPB7.6) (RPABC5) | LOC617375 | POLR2L        | -0.1899 | 0.1382 | 3.7159  | 3 | 0.1382 |
| AW465457       | Hs.534591 | similar to Y106G6H.8                                                                    | MGC136990 | C17orf61      | -0.1899 | 0.0722 | 6.2246  | 4 | 0.0722 |
| CR456060       | Hs.435120 | similar to Kinesin family member 1C                                                     | LOC514928 | KIF1C         | -0.1871 | 0.1204 | -4.6529 | 3 | 0.1204 |
| BF046544       | Hs.55041  | mitochondrial ribosomal protein L2                                                      | MRPL2     | MRPL2         | 0.1869  | 0.1382 | 6.2141  | 2 | 0.1382 |
| BF044717       | 0         | 0                                                                                       | 0         | 0             | 0.1863  | 0.1382 | -3.9859 | 3 | 0.1382 |
| CR452280       | Hs.156369 | similar to tenascin N                                                                   | LOC517433 | TNN           | 0.1828  | 0.1658 | 4.2175  | 2 | 0.1658 |
| AW463527       | Hs.523855 | similar to Syntaxin 12                                                                  | LOC505538 | STX12         | -0.1817 | 0.1524 | -4.9826 | 2 | 0.1524 |
| BU01002X1E09   | #N/A      | #N/A                                                                                    | #N/A      | #N/A          | -0.1799 | 0.1382 | 3.7709  | 3 | 0.1382 |
| CR553968       | Hs.181163 | similar to put. HMG-17 protein                                                          | LOC512161 | HMGN2         | -0.1794 | 0.1656 | 4.2984  | 2 | 0.1656 |
| CN441254       | Hs.15591  | hypothetical LOC512756                                                                  | LOC512756 | COPS6         | 0.1793  | 0.1619 | 6.4916  | 1 | 0.1619 |
| CR452002       | Hs.525899 | C6orf49-like protein                                                                    | LOC505031 | C6orf49       | -0.1762 | 0.0722 | -4.8765 | 5 | 0.0722 |
| BF039693       | Bt.87214  | similar to BRG1-Associated Factor 250a                                                  | LOC783818 | LOC783818     | 0.1712  | 0.1503 | -3.2163 | 3 | 0.1503 |
| CN440524       | Hs.436040 | cadherin 13, H-cadherin (heart)                                                         | CDH13     | CDH13         | 0.1710  | 0.1134 | 4.9806  | 3 | 0.1134 |
| CN438132       | Hs.445665 | abhydrolase domain containing 4                                                         | ABHD4     | ABHD4         | -0.1681 | 0.1370 | -4.5000 | 3 | 0.1370 |
| CR454741       | Hs.632191 | similar to RS21-C6 protein                                                              | MGC133613 | XTP3TPA       | 0.1666  | 0.1382 | -7.9103 | 1 | 0.1382 |
| CR550709       | Hs.511801 | similar to CG32955-PF                                                                   | MGC134279 | C17orf49      | -0.1663 | 0.1742 | -5.7172 | 1 | 0.1742 |

|               |           |                                                                      |           |          |         |        |         |   |        |
|---------------|-----------|----------------------------------------------------------------------|-----------|----------|---------|--------|---------|---|--------|
| CN441769      | Hs.317190 | FAD-dependent oxidoreductase domain containing 1                     | FOXRED1   | FOXRED1  | -0.1637 | 0.1382 | -3.5359 | 3 | 0.1382 |
| BF041456      | Hs.162877 | similar to protein kinase C and casein kinase substrate in neurons 2 | MGC137898 | PACSIN2  | -0.1611 | 0.1382 | -4.0245 | 3 | 0.1382 |
| BF039699      | Hs.213198 | similar to paraspeckle protein 1                                     | MGC139047 | PSPC1    | 0.1611  | 0.1382 | 6.4570  | 2 | 0.1382 |
| BF045636      | Mm.34775  | pyruvate dehydrogenase E1 component alpha subunit precursor          | PDHA      | Pdha1    | 0.1589  | 0.1382 | -3.9479 | 3 | 0.1382 |
| BF039711      | Hs.75277  | hypothetical LOC516731                                               | LOC516731 | RMND5A   | 0.1581  | 0.1656 | -6.3627 | 1 | 0.1656 |
| BP230036000G7 | Hs.479898 | sulfotransferase, estrogen-preferring                                | STE       | SULT1E1  | 0.1458  | 0.1382 | 8.7596  | 1 | 0.1382 |
| BP230036000G2 | 0         | 0                                                                    | 0         | 0        | 0.1445  | 0.1619 | 6.6143  | 1 | 0.1619 |
| BF043536      | Hs.517546 | similar to Oxysterol binding protein 2                               | LOC510311 | OSBP2    | 0.1395  | 0.1714 | 5.8135  | 1 | 0.1714 |
| BF040119      | Hs.78960  | similar to LATS, large tumor suppressor, homolog 2 (Drosophila)      | LOC508208 | LATS2    | -0.1314 | 0.1658 | -4.2741 | 2 | 0.1658 |
| CN436096      | Hs.13366  | similar to Chromosome 6 open reading frame 151                       | LOC513601 | C6orf151 | -0.1293 | 0.1619 | -4.5073 | 2 | 0.1619 |
| BM364411      | Hs.8008   | similar to DNMT1 associated protein-1                                | MGC139005 | DMAP1    | 0.1288  | 0.1658 | -4.2301 | 2 | 0.1658 |
| BP230036000D6 | Bt.1656   | msh homeobox 1                                                       | MSX1      | MSX1     | 0.1267  | 0.1524 | -3.0864 | 3 | 0.1524 |
| BI535499      | Hs.389461 | similar to SMAP-1b                                                   | LOC535692 | UNC45A   | -0.1249 | 0.1764 | -5.5652 | 1 | 0.1764 |
