# Supplementary material
Source: PubMed Central journal article supplement (PMC2667091)
Supplement: 0812722106_ST2_PDF.pdf [file 0812722106_ST2_PDF.pdf]

**Table 2.** Top list of the genes (n = 100) displaying the highest differential expression in the AI vs. SCNT profiles in bovine endometrial caruncles and intercaruncular areas

| Gene accession n°                                                                         | Unigene ID | Bovine gene name                                                                                                                 | Bovine gene symbol | Human gene symbol | Log ratio | BH p-value |
|-------------------------------------------------------------------------------------------|------------|----------------------------------------------------------------------------------------------------------------------------------|--------------------|-------------------|-----------|------------|
| <b>Top list of the 100 most regulated genes in the [AI vs. SCNT] profiles -caruncles-</b> |            |                                                                                                                                  |                    |                   |           |            |
| BF040646                                                                                  | Bt.262     | trophoblast Kunitz domain protein 3                                                                                              | TKDP3              | TKDP3             | 2.4181    | 0.0000     |
| BF042678                                                                                  | Bt.4560    | trophoblast Kunitz domain protein 1                                                                                              | TKDP1              | TKDP1             | 2.2450    | 0.0001     |
| AW461434                                                                                  | Bt.3976    | trophoblast Kunitz domain protein 4                                                                                              | TKDP4              | TKDP4             | 2.0132    | 0.0011     |
| BF041123                                                                                  | Hs.521459  | similar to ADAM DEC1 precursor (A disintegrin and metalloproteinase domain-like protein decysin 1) (ADAM-like protein decysin 1) | LOC505890          | ADAMDEC1          | -1.7646   | 0.0004     |
| BF440401                                                                                  | Hs.387679  | major histocompatibility complex, class II, DQ alpha 5                                                                           | BOLA-DQA5          | HLA-DQA1          | -1.7570   | 0.0179     |
| BF045610                                                                                  | Hs.647247  | pregnancy-associated glycoprotein 12                                                                                             | PAG12              | PGA3              | 1.3351    | 0.0469     |
| BM364543                                                                                  | Bt.32395   | similar to RP11-100C15.2                                                                                                         | LOC506553          | LOC506553         | -1.3318   | 0.0395     |
| BM365410                                                                                  | Hs.653339  | major histocompatibility complex, class II, DQ beta                                                                              | BOLA-DQB           | HLA-DQB1          | -1.2991   | 0.0347     |
| AW463930                                                                                  | Hs.436568  | similar to CD74 antigen                                                                                                          | MGC127643          | CD74              | -1.2573   | 0.0339     |
| BM362640                                                                                  | Hs.534322  | linker for activation of T cells                                                                                                 | LOC514735          | hCG_1998957       | -1.2283   | 0.0296     |
| BF440380                                                                                  | Hs.591492  | similar to IL-6 receptor alpha chain                                                                                             | LOC507359          | IL6R              | -1.2241   | 0.0187     |
| CO889316                                                                                  | 0          | similar to MHC class II antigen                                                                                                  | LOC786695          | LOC730415         | -1.2150   | 0.0395     |
| CN786320                                                                                  | Hs.494496  | fructose-1,6-bisphosphatase 2                                                                                                    | FBP2               | FBP1              | 1.1570    | 0.0219     |
| CK940257                                                                                  | Hs.49765   | similar to very long-chain acyl-CoA synthetase homolog 1; VLCS-H1                                                                | LOC537062          | SLC27A6           | -1.1209   | 0.0183     |
| NM_174641                                                                                 | Hs.77890   | guanylate cyclase 1, soluble, beta 3                                                                                             | GUCY1B3            | GUCY1B3           | -1.1097   | 0.0469     |
| NM_174143                                                                                 | Hs.497589  | polymeric immunoglobulin receptor                                                                                                | PIGR               | PIGR              | -1.0991   | 0.0408     |
| NG010008B20G10                                                                            | Hs.135087  | Transcribed locus                                                                                                                | 0                  | 0                 | -1.0622   | 0.0388     |
| CK845888                                                                                  | Hs.77348   | hydroxyprostaglandin dehydrogenase 15-(NAD)                                                                                      | PGDH               | HPGD              | -1.0116   | 0.0369     |
| NM_174697                                                                                 | Hs.65551   | von Ebner minor salivary gland protein                                                                                           | C20orf114          | C20orf114         | -1.0109   | 0.0339     |
| CN437321                                                                                  | Hs.11916   | hypothetical LOC514143                                                                                                           | LOC514143          | RBKS              | 1.0015    | 0.0179     |
| BF045350                                                                                  | Hs.534322  | similar to MHC class II antigen                                                                                                  | LOC786695          | hCG_1998957       | -0.9980   | 0.0269     |

|                |           |                                                                                             |           |             |         |        |
|----------------|-----------|---------------------------------------------------------------------------------------------|-----------|-------------|---------|--------|
| BF440410       | Bt.40266  | similar to KIAA0351                                                                         | LOC616166 | LOC616166   | -0.9952 | 0.0269 |
| CN441038       | Hs.241586 | similar to Lymphocyte antigen 6 complex locus G6C protein precursor                         | MGC155145 | LY6G6C      | 0.9739  | 0.0439 |
| AW477707       | Hs.521934 | solute carrier family 39 (zinc transporter), member 4                                       | SLC39A4   | SLC39A4     | -0.9323 | 0.0269 |
| BM363079       | Bt.64595  | MHC class I heavy chain                                                                     | LOC510417 | LOC510417   | -0.9185 | 0.0269 |
| BF039883       | Hs.164070 | similar to C-terminal modulator protein                                                     | MGC152209 | THEM4       | 0.9178  | 0.0479 |
| CN440001       | Hs.495912 | Transcribed locus                                                                           | 0         | DMD         | -0.9116 | 0.0269 |
| CR453257       | Bt.28518  | spleen trypsin inhibitor                                                                    | LOC404103 | LOC404103   | -0.9104 | 0.0269 |
| TC226667       | Hs.155651 | hepatocyte nuclear factor 3 beta                                                            | HNF-3b    | FOXA2       | -0.9103 | 0.0347 |
| CN438214       | Hs.483873 | similar to GM2 activator protein                                                            | LOC504524 | GM2A        | -0.9090 | 0.0269 |
| NM_181003      | Hs.315369 | aquaporin 4                                                                                 | AQP4      | AQP4        | -0.9057 | 0.0269 |
| BF040927       | Hs.446315 | hypothetical LOC535023                                                                      | MGC137524 | FAM107B     | -0.8985 | 0.0269 |
| BF046516       | Hs.504315 | suppression of tumorigenicity 14                                                            | ST14      | ST14        | -0.8870 | 0.0296 |
| BF044364       | Bt.64701  | connexin 26 protein                                                                         | CX26      | CX26        | 0.8167  | 0.0341 |
| CK394139       | 0         | Transcribed locus                                                                           | 0         | SNORD114-25 | 0.8135  | 0.0395 |
| BP270001A20E09 | Hs.123659 | similar to sphingomyelin phosphodiesterase, acid-like 3B                                    | LOC518699 | SMPDL3B     | 0.8107  | 0.0469 |
| NM_174292      | Hs.376209 | crystallin, gamma S                                                                         | CRYGS     | CRYGS       | 0.8051  | 0.0395 |
| BM362465       | Hs.8372   | ubiquinol-cytochrome c reductase (6.4kD) subunit                                            | UQCR      | UQCR        | 0.8035  | 0.0269 |
| CN440346       | Hs.371249 | pleiotrophin                                                                                | PTN       | PTN         | 0.7980  | 0.0280 |
| BF039725       | Hs.478125 | similar to InaD-like protein                                                                | LOC536993 | INADL       | -0.7973 | 0.0439 |
| CN436615       | Hs.289795 | similar to Fetal brain protein 239 (239FB)                                                  | MGC143166 | MPPED2      | -0.7949 | 0.0395 |
| NM_174202      | Hs.592982 | tryptase beta 1                                                                             | TPSB1     | TPSB2       | -0.7949 | 0.0469 |
| CR452655       | Bt.13834  | similar to transferrin receptor                                                             | LOC504698 | LOC504698   | 0.7926  | 0.0296 |
| CR452494       | Hs.489142 | collagen, type I, alpha 2                                                                   | COL1A2    | COL1A2      | 0.7786  | 0.0269 |
| CR452821       | Hs.130497 | hypothetical LOC506918                                                                      | LOC506918 | FXD4        | 0.7782  | 0.0271 |
| BF045453       | Bt.76784  | similar to C2orf29 protein                                                                  | LOC506268 | LOC506267   | -0.7764 | 0.0269 |
| NG010005A10E08 | Bt.20831  | methionine aminopeptidase 1D                                                                | MAP1D     | MAP1D       | -0.7718 | 0.0408 |
| CR456021       | Hs.644618 | solute carrier family 25 (mitochondrial carrier; adenine nucleotide translocator), member 5 | SLC25A5   | SLC25A5     | 0.7706  | 0.0269 |
| CN439090       | Mm.4913   | Transcribed locus                                                                           | 0         | Fst         | 0.7603  | 0.0269 |
| BF041020       | Hs.498892 | similar to elongation factor-2 kinase                                                       | LOC521730 | EEF2K       | -0.7534 | 0.0269 |
| NG010008B10D01 | Hs.195471 | 6-phosphofructo-2-kinase                                                                    | LOC407183 | PFKFB3      | -0.7455 | 0.0479 |
| BF045639       | Hs.483473 | similar to Chromosome 5 open reading frame 5                                                | LOC540987 | C5orf5      | 0.7390  | 0.0269 |
| BF044113       | Hs.142074 | hypothetical LOC506267                                                                      | LOC506267 | RNF149      | -0.7333 | 0.0347 |

|                |           |                                                                                                                         |           |           |         |        |
|----------------|-----------|-------------------------------------------------------------------------------------------------------------------------|-----------|-----------|---------|--------|
| BF042234       | Hs.525589 | similar to Os08g0528700                                                                                                 | LOC509824 | MEG3      | 0.7138  | 0.0296 |
| CN435833       | Bt.26852  | similar to Fetal brain protein 239 (239FB)                                                                              | MGC143166 | MGC143166 | -0.7107 | 0.0395 |
| BF045339       | Hs.617193 | ribosomal protein L12                                                                                                   | RPL12     | CYCS      | 0.7078  | 0.0331 |
| CR454665       | Hs.164226 | thrombospondin                                                                                                          | THBS      | THBS1     | -0.7070 | 0.0269 |
| CN437925       | Hs.212360 | Transcribed locus                                                                                                       | 0         | DNAH5     | -0.7058 | 0.0269 |
| AW462092       | Bt.15758  | prostaglandin-endoperoxide synthase 2 (prostaglandin G/H synthase and cyclooxygenase)                                   | PTGS2     | PTGS2     | 0.7051  | 0.0341 |
| CO728320       | Hs.387367 | hypothetical LOC511195                                                                                                  | LOC511195 | CYP39A1   | -0.7019 | 0.0339 |
| CN442239       | Bt.30781  | similar to elongation factor 1 alpha                                                                                    | LOC782989 | LOC782989 | 0.7014  | 0.0466 |
| CN441033       | Hs.233240 | similar to alpha 3 type VI collagen isoform 5 precursor                                                                 | LOC530657 | COL6A3    | 0.7011  | 0.0296 |
| BF043599       | Hs.368260 | hypothetical protein LOC616622                                                                                          | MGC127064 | ATAD4     | -0.6978 | 0.0269 |
| CR455736       | Hs.512235 | similar to inositol 1,4,5-trisphosphate receptor type 2                                                                 | LOC781844 | ITPR2     | -0.6974 | 0.0269 |
| BP260004000A04 | Hs.86859  | similar to Growth factor receptor-bound protein 7 (GRB7 adapter protein) (Epidermal growth factor receptor GRB-7) (B47) | MGC138032 | GRB7      | -0.6944 | 0.0269 |
| BM364040       | Hs.512805 | similar to CG10510-PA                                                                                                   | MGC133899 | CCDC65    | -0.6822 | 0.0269 |
| CR452435       | Bt.991    | similar to collagen, type XXVII, alpha 1                                                                                | LOC513668 | LOC513668 | 0.6819  | 0.0331 |
| BF042921       | Hs.653884 | Transcribed locus                                                                                                       | 0         | IGF1R     | -0.6805 | 0.0430 |
| CN442098       | Hs.520028 | heat shock 70kDa protein 1A                                                                                             | HSPA1A    | HSPA1A    | -0.6712 | 0.0269 |
| X00673         | Hs.361463 | coagulation factor X                                                                                                    | F10       | F10       | 0.6688  | 0.0280 |
| AW466018       | Hs.155097 | carbonic anhydrase II                                                                                                   | CA2       | CA2       | 0.6666  | 0.0269 |
| CN435531       | Hs.647659 | hypothetical LOC528123                                                                                                  | LOC528123 | GPR177    | -0.6626 | 0.0454 |
| NM_174599      | Hs.444915 | solute carrier family 1 (neuronal/epithelial high affinity glutamate transporter, system Xag), member 1                 | SLC1A1    | SLC1A1    | -0.6625 | 0.0269 |
| CN438106       | Hs.632326 | similar to SRp40-1                                                                                                      | LOC510474 | SFRS5     | -0.6623 | 0.0296 |
| BF045037       | Hs.594952 | desmin                                                                                                                  | DES       | DES       | 0.6598  | 0.0341 |
| CN433042       | Hs.34114  | similar to Na,K-ATPase subunit alpha 2                                                                                  | MGC143081 | ATP1A2    | 0.6571  | 0.0439 |
| CR454408       | Hs.647774 | Transcribed locus                                                                                                       | 0         | RHOA      | 0.6566  | 0.0296 |
| AW463491       | Hs.517033 | transglutaminase 2 (C polypeptide, protein-glutamine-gamma-glutamyltransferase)                                         | TGM2      | TGM2      | -0.6533 | 0.0322 |
| BF440593       | Bt.64871  | immunoglobulin J chain                                                                                                  | IGJ       | IGJ       | 0.6525  | 0.0322 |
| BF039398       | Bt.13202  | Transcribed locus                                                                                                       | 0         | 0         | -0.6504 | 0.0269 |
| CR455921       | Bt.62548  | similar to Os08g0528700                                                                                                 | LOC509824 | LOC509824 | 0.6488  | 0.0341 |
| BF042389       | Hs.504877 | Rho GDP dissociation inhibitor (GDI) beta                                                                               | ARHGDIB   | ARHGDIB   | -0.6487 | 0.0296 |
| CN437486       | Hs.514292 | similar to HOXB8                                                                                                        | LOC785855 | HOXB8     | -0.6451 | 0.0395 |

|          |           |                                                                                                                               |           |           |         |        |
|----------|-----------|-------------------------------------------------------------------------------------------------------------------------------|-----------|-----------|---------|--------|
| BF045795 | Hs.291030 | Transcribed locus, moderately similar to XP_341878.3 similar to Ras GTPase-activating-like protein IQGAP1 [Rattus norvegicus] | 0         | IQGAP2    | -0.6441 | 0.0347 |
| BM366891 | Bt.36160  | similar to TNF-induced protein GG2-1                                                                                          | LOC529336 | LOC529336 | -0.6428 | 0.0430 |
| AW465681 | Hs.171695 | MAP kinase phosphatase-1                                                                                                      | MKP-1     | DUSP1     | -0.6422 | 0.0341 |
| CN434722 | Hs.436944 | similar to sprouty-like protein                                                                                               | LOC507095 | SPRY1     | -0.6413 | 0.0296 |
| CR453552 | Hs.286233 | similar to Sperm surface protein Sp17 (Sperm autoantigenic protein 17) (Sperm protein 17) (Sp17-1)                            | LOC616974 | SPA17     | -0.6391 | 0.0269 |
| CR551953 | Hs.59506  | similar to doublesex and mab-3 related transcription factor 2                                                                 | LOC514435 | DMRT2     | 0.6380  | 0.0341 |
| CO729081 | Hs.7444   | sperm associated antigen 6                                                                                                    | SPAG6     | SPAG6     | -0.6374 | 0.0296 |
| AW445383 | Hs.444049 | B-cell linker                                                                                                                 | BLNK      | BLNK      | -0.6303 | 0.0469 |
| BF039401 | 0         | 0                                                                                                                             | 0         | 0         | -0.6180 | 0.0495 |
| CN438559 | Bt.21448  | similar to mFLJ00098 protein                                                                                                  | LOC528038 | LOC528038 | -0.6172 | 0.0296 |
| CR453604 | Mm.396893 | Transcribed locus                                                                                                             | 0         | Ppm1k     | -0.6156 | 0.0469 |
| BM362933 | Hs.70312  | cytochrome c oxidase subunit VIIa polypeptide 2 (liver)                                                                       | COX7A2    | COX7A2    | 0.6079  | 0.0296 |
| AW462405 | Hs.464779 | Niemann-Pick disease, type C1                                                                                                 | NPC1      | NPC1      | -0.6039 | 0.0280 |
| CR550763 | Hs.177530 | ATP synthase, H+ transporting, mitochondrial F1 complex, epsilon subunit                                                      | ATP5E     | ATP5E     | 0.5995  | 0.0435 |
| AW463813 | Bt.1199   | similar to OTTHUMP00000028924                                                                                                 | LOC509687 | LOC509687 | 0.5992  | 0.0296 |
| CR454329 | 0         | 0                                                                                                                             | 0         | 0         | -0.5970 | 0.0339 |
| CR451698 | 0         | 0                                                                                                                             | 0         | 0         | -0.5923 | 0.0469 |

**Top list of the 100 most regulated genes in the [AI vs. SCNT] profiles -intercaruncular areas-**

|              |           |                                                                                    |           |           |         |        |
|--------------|-----------|------------------------------------------------------------------------------------|-----------|-----------|---------|--------|
| CK394009     | Hs.632097 | similar to placenta expressed transcript protein                                   | LOC505518 | C11orf34  | 3.5971  | 0.0001 |
| BM361913     | Hs.181244 | MHC Class I JSP.1                                                                  | JSP.1     | HLA-A     | -3.3797 | 0.0294 |
| BM363051     | Hs.584756 | fatty acid binding protein ( heart ) like                                          | FABP      | FABP3     | 3.1538  | 0.0070 |
| A34676       | Hs.522798 | coagulation factor IX                                                              | F9        | F9        | -2.9716 | 0.0455 |
| CN441038     | Hs.241586 | similar to Lymphocyte antigen 6 complex locus G6C protein precursor                | MGC155145 | LY6G6C    | 2.7726  | 0.0003 |
| BM366348     | Hs.467239 | Transcribed locus, weakly similar to NP_065703.1 finger protein 286 [Homo sapiens] | 0         | ZNF347    | -2.3382 | 0.1176 |
| CK394055     | Hs.17518  | similar to radical S-adenosyl methionine domain containing 2                       | MGC128573 | RSAD2     | 2.1815  | 0.1544 |
| BCAZ0002aa24 | Hs.568356 | hypothetical protein MGC128198                                                     | MGC128198 | LOC441632 | 1.7761  | 0.1408 |
| BF039324     | Hs.256278 | tumor necrosis factor receptor superfamily, member 1B                              | TNFRSF1B  | TNFRSF1B  | 1.7550  | 0.0164 |
| CN441344     | Hs.82045  | midkine (neurite growth-promoting factor 2)                                        | MDK       | MDK       | -1.7533 | 0.1217 |
| AW466018     | Hs.155097 | carbonic anhydrase II                                                              | CA2       | CA2       | 1.7364  | 0.0035 |
| BF440401     | Hs.387679 | major histocompatibility complex, class II, DQ alpha 5                             | BOLA-     | HLA-DQA1  | -1.7024 | 0.1217 |

|                |           |                                                                                             | DQA5      |               |         |        |
|----------------|-----------|---------------------------------------------------------------------------------------------|-----------|---------------|---------|--------|
| CN436288       | Mm.24097  | similar to Extracellular proteinase inhibitor                                               | LOC787253 | RP23-430I21.1 | 1.7016  | 0.0037 |
| BP240034A20D7  | Hs.468410 | Transcribed locus                                                                           | 0         | EPAS1         | 1.6731  | 0.0071 |
| NG010006A12H05 | Hs.372303 | Transcribed locus                                                                           | 0         | 0             | 1.6632  | 0.1959 |
| CR451856       | Hs.515517 | ribosomal protein L18                                                                       | RPL18     | RPL18         | -1.6616 | 0.1099 |
| BM363371       | Hs.524760 | 2',5'-oligoadenylate synthetase 1, 40/46kDa                                                 | OAS1      | OAS1          | 1.6449  | 0.1499 |
| AW266913       | Hs.653117 | decorin                                                                                     | DCN       | DCN           | -1.5879 | 0.0226 |
| BM364543       | Bt.32395  | similar to RP11-100C15.2                                                                    | LOC506553 | LOC506553     | -1.5474 | 0.0783 |
| CR452571       | Hs.633514 | TIMP metalloproteinase inhibitor 2                                                          | TIMP2     | TIMP2         | 1.5269  | 0.0132 |
| CR452821       | Hs.130497 | hypothetical LOC506918                                                                      | LOC506918 | FXD4          | 1.4861  | 0.0071 |
| CR454124       | Bt.11748  | similar to FAM20C protein                                                                   | LOC534672 | LOC534672     | 1.4808  | 0.0973 |
| CN433430       | Hs.533566 | hypothetical LOC511905                                                                      | LOC511905 | H19           | -1.4807 | 0.1476 |
| AW461469       | Hs.384598 | serpin peptidase inhibitor, clade G (C1 inhibitor), member 1, (angioedema, hereditary)      | SERPING1  | SERPING1      | 1.4772  | 0.0973 |
| AW463750       | Bt.12177  | claudin 4                                                                                   | CLDN4     | CLDN4         | 1.4706  | 0.0056 |
| BF042446       | Hs.150878 | membrane spanning 4-domain subfamily A member 8B                                            | ms4A8B    | MS4A8B        | 1.4400  | 0.1661 |
| CR553606       | Hs.534457 | similar to Protein C14orf166                                                                | MGC127223 | C14orf166     | -1.3891 | 0.0370 |
| BF043217       | Hs.103147 | similar to SPATA20 protein                                                                  | MGC142822 | SPATA20       | 1.3869  | 0.0455 |
| BP111364       | Hs.5940   | similar to down-regulated in colon cancer 1                                                 | LOC511430 | MUC13         | 1.3868  | 0.1676 |
| AW464260       | Hs.436893 | proton-dependent gastrointestinal peptide transporter 1                                     | PEPT1     | SLC15A1       | 1.3841  | 0.0164 |
| CN439003       | Hs.75061  | similar to MARCKS-like protein                                                              | MGC142786 | MARCKSL1      | -1.3531 | 0.0897 |
| CN786320       | Hs.494496 | fructose-1,6-bisphosphatase 2                                                               | FBP2      | FBP1          | 1.3472  | 0.0370 |
| CR453289       | Bt.58864  | glycerophosphodiester phosphodiesterase domain containing 5                                 | GDPD5     | GDPD5         | 1.3289  | 0.1619 |
| CR456021       | Hs.644618 | solute carrier family 25 (mitochondrial carrier; adenine nucleotide translocator), member 5 | SLC25A5   | SLC25A5       | 1.3161  | 0.0187 |
| CN441490       | Hs.653218 | solute carrier family 2 (facilitated glucose transporter), member 1                         | SLC2A1    | SLC2A1        | 1.3035  | 0.0455 |
| CN440096       | Hs.653210 | stathmin 1/oncoprotein 18                                                                   | STMN1     | STMN1         | -1.3002 | 0.1119 |
| CN441882       | Hs.529353 | acetyl-Coenzyme A synthetase 2 (AMP forming)-like                                           | ACAS2L    | ACSS1         | 1.2778  | 0.0461 |
| X55389         | Hs.271135 | ATP synthase, H+ transporting, mitochondrial F1 complex, gamma polypeptide 1                | ATP5C1    | ATP5C1        | 1.2753  | 0.1333 |
| CR455491       | Hs.110675 | Lutheran blood group (Auberger b antigen included)                                          | LU        | BCAM          | 1.2692  | 0.0490 |
| BM253177       | Hs.87619  | Transcribed locus                                                                           | 0         | TMEM28        | 1.2625  | 0.1120 |

|           |           |                                                                                                               |           |           |         |        |
|-----------|-----------|---------------------------------------------------------------------------------------------------------------|-----------|-----------|---------|--------|
| AW267059  | Hs.460558 | sulfotransferase family, cytosolic, 1A, phenol-preferring, member 1                                           | SULT1A1   | SULT1A4   | 1.2466  | 0.1363 |
| CN439210  | Hs.524390 | similar to alpha-tubulin                                                                                      | LOC407195 | TUBA1A    | -1.2458 | 0.1195 |
| BF041211  | Hs.522401 | similar to RIKEN cDNA 9130404D14 gene                                                                         | LOC613747 | FAM129B   | 1.2402  | 0.0783 |
| CN441890  | Hs.307835 | Transcribed locus, strongly similar to XP_574644.2 similar to phosphoglucomutase 5 [Rattus norvegicus]        | 0         | PGM5      | -1.2334 | 0.1993 |
| BM366252  | Hs.664319 | similar to myosin 18A                                                                                         | LOC519634 | TIAF1     | 1.2242  | 0.0782 |
| BM288090  | Hs.631841 | similar to paralemmin-1                                                                                       | LOC786096 | PALM      | 1.2083  | 0.0377 |
| BF440419  | Hs.519347 | similar to splicing factor, arginine/serine-rich 12                                                           | LOC507801 | SFRS12    | -1.2003 | 0.1409 |
| CR454198  | Hs.525622 | ribosomal protein S10                                                                                         | RPS10     | AKT1      | -1.1889 | 0.1120 |
| AW464262  | Mm.404295 | similar to Neurobeachin-like 1 (Amyotrophic lateral sclerosis 2 chromosomal region candidate gene 17 protein) | LOC524280 | Nbeal1    | 1.1823  | 0.1333 |
| CN439330  | Bt.30099  | fatty acid synthase                                                                                           | FASN      | FASN      | 1.1807  | 0.0071 |
| CN435801  | Bt.22503  | similar to Protein C21orf59                                                                                   | MGC134342 | MGC134342 | 1.1581  | 0.1877 |
| AW464583  | 0         | 0                                                                                                             | 0         | 0         | 1.1558  | 0.0973 |
| NM_174292 | Hs.376209 | crystallin, gamma S                                                                                           | CRYGS     | CRYGS     | 1.1551  | 0.1268 |
| BF440309  | Hs.645562 | similar to putative DNA dependent ATPase and helicase                                                         | LOC514473 | ATRX      | -1.1409 | 0.0973 |
| BF044364  | Bt.64701  | connexin 26 protein                                                                                           | CX26      | CX26      | 1.1348  | 0.0035 |
| BF043281  | Hs.591234 | connexin 26 protein                                                                                           | CX26      | GJB2      | 1.1169  | 0.0164 |
| CN436944  | Hs.652340 | similar to MREG protein                                                                                       | LOC613445 | MREG      | -1.1159 | 0.1512 |
| BF039401  | 0         | 0                                                                                                             | 0         | 0         | 1.1111  | 0.1803 |
| BF039907  | Hs.25647  | v-fos FBJ murine osteosarcoma viral oncogene homolog                                                          | FOS       | FOS       | -1.1022 | 0.0208 |
| NM_174447 | Hs.123072 | RAB3B, member RAS oncogene family                                                                             | RAB3B     | RAB3B     | 1.0972  | 0.0054 |
| CN439555  | Hs.546392 | placenta-specific 8                                                                                           | PLAC8     | PLAC8     | -1.0939 | 0.1132 |
| CN440346  | Hs.371249 | pleiotrophin                                                                                                  | PTN       | PTN       | -1.0837 | 0.0695 |
| NM_176650 | Hs.159161 | Rho GDP dissociation inhibitor (GDI) alpha                                                                    | ARHGDI1   | ARHGDI1   | 1.0787  | 0.1120 |
| CR456038  | Hs.535891 | Ribosomal protein S3Ae                                                                                        | RPS3AE    | CHRM2     | -1.0720 | 0.0897 |
| BM363628  | Hs.598335 | 0                                                                                                             | 0         | 0         | 1.0715  | 0.1444 |
| BF039836  | Hs.149185 | similar to CNDP dipeptidase 2 (metallopeptidase M20 family) (predicted)                                       | MGC127325 | CNDP2     | 1.0686  | 0.0973 |
| CR553944  | Hs.474751 | non-muscle myosin heavy chain                                                                                 | LOC404108 | MYH9      | 1.0664  | 0.0490 |
| CN435672  | Hs.615223 | hypothetical LOC618459                                                                                        | LOC618459 | FAM101B   | 1.0649  | 0.0763 |
| BF043004  | Hs.414579 | scotin                                                                                                        | SCOTIN    | SCOTIN    | 1.0627  | 0.0679 |

|                |           |                                                                                         |           |           |         |        |
|----------------|-----------|-----------------------------------------------------------------------------------------|-----------|-----------|---------|--------|
| AW487381       | Hs.97044  | similar to cardiac voltage gated potassium channel modulatory subunit                   | LOC540895 | KCNIP2    | 1.0376  | 0.0616 |
| CK394213       | Hs.653685 | similar to CD59 antigen p18-20                                                          | MGC133675 | CD59      | -1.0371 | 0.1132 |
| CK954882       | Hs.592130 | nuclear receptor subfamily 1, group D, member 1                                         | NR1D1     | NR1D1     | 1.0174  | 0.0744 |
| AW461370       | Bt.30287  | similar to DNA helicase                                                                 | MGC148976 | MGC148976 | -1.0138 | 0.0490 |
| BF046114       | Hs.476308 | similar to 5-aminolevulinic synthase                                                    | LOC534286 | ALAS1     | 1.0112  | 0.0001 |
| AW465148       | Hs.322852 | similar to Growth arrest-specific 2 like 1                                              | LOC518935 | GAS2L1    | 1.0083  | 0.1176 |
| CK769923       | Hs.109    | similar to cyclin-dependent kinase (CDC2-like) 10                                       | MGC134436 | CDK10     | 1.0010  | 0.1363 |
| BM365410       | Hs.653339 | major histocompatibility complex, class II, DQ beta                                     | BOLA-DQB  | HLA-DQB1  | -0.9994 | 0.0897 |
| CN442048       | Bt.9679   | similar to WDNM1 protein                                                                | LOC785026 | LOC785058 | 0.9953  | 0.0180 |
| AW463918       | Hs.514220 | hypothetical protein MGC127568                                                          | MGC127568 | GRN       | 0.9953  | 0.0897 |
| BP22000618703  | Hs.650377 | similar to GYG2 protein                                                                 | LOC505258 | GYG2      | 0.9950  | 0.0868 |
| BM366091       | 0         | 0                                                                                       | 0         | 0         | 0.9945  | 0.1562 |
| BF039054       | Bt.44211  | hypothetical protein MGC137469                                                          | MGC137469 | MGC137469 | 0.9931  | 0.1302 |
| BF041571       | Hs.569310 | similar to CDC42 binding protein kinase beta (DMPK-like)                                | LOC508226 | CDC42BPB  | 0.9871  | 0.1992 |
| CN435575       | Hs.97887  | 0                                                                                       | 0         | RCN1      | -0.9751 | 0.1120 |
| CN438896       | Hs.520037 | NEU1-like protein                                                                       | LOC505554 | NEU1      | 0.9739  | 0.0455 |
| AV590463       | Hs.190621 | similar to KIAA0868 protein                                                             | LOC516395 | CNTNAP2   | 0.9683  | 0.0973 |
| BF039384       | Hs.76753  | endoglin (Osler-Rendu-Weber syndrome 1)                                                 | ENG       | ENG       | 0.9660  | 0.1392 |
| CN439240       | Bt.51947  | similar to LBP-1c=transcription factor alpha-globin CP2 homolog {alternatively spliced} | MGC139461 | MGC139461 | -0.9650 | 0.1187 |
| AW462178       | Hs.400431 | similar to ELKS epsilon                                                                 | LOC519271 | ERC1      | 0.9629  | 0.1409 |
| CR551335       | Hs.643610 | aconitase 2, mitochondrial                                                              | ACO2      | ACO2      | 0.9549  | 0.0663 |
| BP260011000E09 | Bt.45570  | endothelial PAS domain protein 1                                                        | EPAS1     | EPAS1     | 0.9507  | 0.0969 |
| AW445488       | Hs.91481  | EGF-like-domain, multiple 7                                                             | EGFL7     | EGFL7     | 0.9435  | 0.0897 |
| BF440311       | Bt.6812   | Transcribed locus                                                                       | 0         | 0         | 0.9434  | 0.1216 |
| BF040461       | Hs.643483 | calmodulin 2                                                                            | CALM2     | CALM2     | -0.9432 | 0.1858 |
| BF041709       | Hs.277035 | monoglyceride lipase                                                                    | MGLL      | MGLL      | 0.9419  | 0.0783 |
| AW266929       | Hs.652594 | glutathione peroxidase 3 (plasma)                                                       | GPX3      | GPX3      | 0.9357  | 0.0540 |
| CR451675       | Hs.592514 | Transcribed locus                                                                       | 0         | CCDC50    | -0.9349 | 0.0455 |
| CN435551       | Hs.647061 | elastin                                                                                 | ELN       | ELN       | 0.9314  | 0.1499 |
| BF043685       | Hs.408515 | similar to neuregulin 2                                                                 | LOC783452 | NRG2      | 0.9285  | 0.0973 |
| AW465147       | Bt.7967   | vav 2 protein                                                                           | LOC515718 | LOC515718 | 0.9276  | 0.1557 |
