# Supplementary material
Source: PubMed Central journal article supplement (PMC2667091)
Supplement: 0812722106_ST3_PDF.pdf [file 0812722106_ST3_PDF.pdf]

**Table S3.** Most significant IPA Bio-Functions ( $P < 0.01$ ) for the AI vs. SCNT profiles in bovine endometrial caruncles and intercaruncular areas

| Category                                                                     | P-value           | Number of genes |
|------------------------------------------------------------------------------|-------------------|-----------------|
| <b>IPA Biofunction in the [AI vs. SCNT] profiles -caruncles-</b>             |                   |                 |
| Cell Death                                                                   | 1,62E-05-2,38E-02 | 52              |
| Tumor Morphology                                                             | 4,6E-05-2,13E-02  | 8               |
| Cellular Growth and Proliferation                                            | 5,15E-05-2,6E-02  | 47              |
| Cell Cycle                                                                   | 5,32E-04-2,23E-02 | 12              |
| Immune Response                                                              | 9,57E-04-2,38E-02 | 18              |
| Lipid Metabolism                                                             | 1,05E-03-2,38E-02 | 8               |
| Small Molecule Biochemistry                                                  | 1,05E-03-2,38E-02 | 18              |
| Cellular Movement                                                            | 1,16E-03-2,41E-02 | 32              |
| Hematological System Development and Function                                | 1,16E-03-2,38E-02 | 16              |
| Tissue Development                                                           | 1,39E-03-2,52E-02 | 24              |
| Reproductive System Development and Function                                 | 1,95E-03-2,07E-02 | 8               |
| Cellular Function and Maintenance                                            | 2,59E-03-2,23E-02 | 13              |
| Organ Morphology                                                             | 2,59E-03-1,9E-02  | 9               |
| Nucleic Acid Metabolism                                                      | 3,59E-03-1,34E-02 | 5               |
| Tissue Morphology                                                            | 3,59E-03-1,34E-02 | 7               |
| Cell Morphology                                                              | 4,67E-03-1,34E-02 | 11              |
| Organismal Development                                                       | 6,05E-03-1,67E-02 | 23              |
| Skeletal and Muscular System Development and Function                        | 6,05E-03-2,52E-02 | 20              |
| Molecular Transport                                                          | 6,06E-03-2,23E-02 | 10              |
| Cellular Development                                                         | 7,17E-03-2,33E-02 | 31              |
| Cellular Compromise                                                          | 7,5E-03-1,98E-02  | 10              |
| Connective Tissue Development and Function                                   | 7,5E-03-2,38E-02  | 7               |
| <b>IPA Biofunction in the [AI vs. SCNT] profiles -intercaruncular areas-</b> |                   |                 |
| Cell-To-Cell Signaling and Interaction                                       | 2,34E-06-1,64E-02 | 27              |
| Cellular Movement                                                            | 3,07E-06-1,86E-02 | 54              |
| Cardiovascular System Development and Function                               | 2,22E-05-1,85E-02 | 28              |
| Cellular Growth and Proliferation                                            | 1,3E-04-1,92E-02  | 78              |
| Cellular Assembly and Organization                                           | 1,33E-04-1,64E-02 | 17              |
| Cell Death                                                                   | 1,38E-04-1,94E-02 | 67              |
| Lipid Metabolism                                                             | 1,43E-04-1,83E-02 | 22              |
| Small Molecule Biochemistry                                                  | 1,43E-04-1,85E-02 | 38              |
| Connective Tissue Development and Function                                   | 2,67E-04-1,64E-02 | 18              |
| Organ Development                                                            | 3,95E-04-1,05E-02 | 11              |
| Visual System Development and Function                                       | 3,95E-04-3,89E-03 | 6               |

|                                                       |                   |    |
|-------------------------------------------------------|-------------------|----|
| Carbohydrate Metabolism                               | 4,05E-04-1,42E-02 | 14 |
| Cell Cycle                                            | 4,05E-04-1,94E-02 | 29 |
| Molecular Transport                                   | 4,05E-04-1,66E-02 | 37 |
| Nucleic Acid Metabolism                               | 4,05E-04-7,95E-03 | 7  |
| Skeletal and Muscular System Development and Function | 4,05E-04-1,33E-02 | 10 |
| Hematological System Development and Function         | 4,2E-04-1,76E-02  | 31 |
| Immune and Lymphatic System Development and Function  | 4,2E-04-8,34E-03  | 8  |
| Tissue Development                                    | 4,2E-04-1,07E-02  | 8  |
| Immune Response                                       | 6,05E-04-1,76E-02 | 17 |
| Cellular Development                                  | 6,21E-04-1,92E-02 | 56 |
| Reproductive System Development and Function          | 6,21E-04-7,95E-03 | 10 |
| Tissue Morphology                                     | 1,18E-03-1,64E-02 | 17 |
| Nervous System Development and Function               | 1,2E-03-9,39E-03  | 15 |
| Organ Morphology                                      | 1,2E-03-1,06E-02  | 10 |
| Tumor Morphology                                      | 1,25E-03-1,64E-02 | 13 |
| Organismal Functions                                  | 1,78E-03-1,83E-02 | 6  |
| Cell Morphology                                       | 2,25E-03-1,66E-02 | 33 |
| Organismal Survival                                   | 2,34E-03-1,86E-02 | 37 |
| Embryonic Development                                 | 2,92E-03-1,05E-02 | 5  |
| Amino Acid Metabolism                                 | 5,76E-03-1,85E-02 | 8  |
| Organismal Development                                | 5,99E-03-1,33E-02 | 9  |
| Post-Translational Modification                       | 9,88E-03-1,85E-02 | 6  |
