# Supplementary material
Source: PubMed Central journal article supplement (PMC2667091)
Supplement: 0812722106_ST4_PDF.pdf [file 0812722106_ST4_PDF.pdf]

**Table 4.** Most significant IPA Canonical Pathways (CP;  $P < 0.05$ ) for the AI vs. SCNT profiles in bovine endometrial caruncles and intercaruncular areas

| Pathway                                                                            | P-value  | Nb. of genes |
|------------------------------------------------------------------------------------|----------|--------------|
| <b>IPA Canonical pathway in the [AI vs. SCNT] profiles - caruncles-</b>            |          |              |
| Oxidative Phosphorylation                                                          | 1.10E-17 | 22           |
| Mitochondrial Dysfunction                                                          | 1.16E-07 | 12           |
| Ubiquinone Biosynthesis                                                            | 1.16E-05 | 7            |
| Antigen Presentation Pathway                                                       | 1.31E-03 | 4            |
| Fructose and Mannose Metabolism                                                    | 3.08E-02 | 3            |
| Purine Metabolism                                                                  | 3.75E-02 | 8            |
| <b>IPA Canonical pathway in the [AI vs. SCNT] profiles -intercaruncular areas-</b> |          |              |
| Tight Junction Signaling                                                           | 1.01E-03 | 10           |
| Hepatic Fibrosis / Hepatic Stellate Cell Activation                                | 3.77E-03 | 8            |
| Acute Phase Response Signaling                                                     | 6.73E-03 | 9            |
| Neuregulin Signaling                                                               | 7.75E-03 | 6            |
| IGF-1 Signaling                                                                    | 7.75E-03 | 6            |
| NRF2-mediated Oxidative Stress Response                                            | 8.40E-03 | 9            |
| LXR/RXR Activation                                                                 | 1.26E-02 | 5            |
| PXR/RXR Activation                                                                 | 1.26E-02 | 5            |
| Integrin Signaling                                                                 | 1.68E-02 | 9            |
| RAR Activation                                                                     | 1.80E-02 | 8            |
| Ceramide Signaling                                                                 | 1.92E-02 | 5            |
| Actin Cytoskeleton Signaling                                                       | 1.95E-02 | 9            |
| TR/RXR Activation                                                                  | 2.60E-02 | 5            |
| VEGF Signaling                                                                     | 2.60E-02 | 5            |
| PI3K/AKT Signaling                                                                 | 2.99E-02 | 6            |
| PTEN Signaling                                                                     | 3.24E-02 | 5            |
| Leukocyte Extravasation Signaling                                                  | 3.48E-02 | 8            |
| Insulin Receptor Signaling                                                         | 3.82E-02 | 6            |
| LPS/IL-1 Mediated Inhibition of RXR Function                                       | 3.97E-02 | 8            |
| Mitochondrial Dysfunction                                                          | 4.21E-02 | 6            |
