# Supplementary material
Source: PubMed Central journal article supplement (PMC2667091)
Supplement: 0812722106_ST5_PDF.pdf [file 0812722106_ST5_PDF.pdf]

**Table 5.** Top list of the genes (n = 100) displaying the highest differential expression for the C vs. IC profiles in AI, IVF-ET, and SCNT pregnancies

| GenBank accession n°                                                                        | Unigene ID | Bovine gene name                                                                                                                                            | Bovine gene symbol | Human gene symbol | Log Ratio   | BH p-value |
|---------------------------------------------------------------------------------------------|------------|-------------------------------------------------------------------------------------------------------------------------------------------------------------|--------------------|-------------------|-------------|------------|
| <b>Top list of the 100 most regulated genes in the [C vs. IC] profiles -AI pregnancies-</b> |            |                                                                                                                                                             |                    |                   |             |            |
| CN441033                                                                                    | Hs.233240  | similar to alpha 3 type VI collagen isoform 5 precursor                                                                                                     | LOC530657          | COL6A3            | 1.0909E+00  | 9.8955E-05 |
| CR453977                                                                                    | Hs.639     | calbindin 3, (vitamin D-dependent calcium binding protein)                                                                                                  | CALB3              | S100G             | -1.2510E+00 | 6.4192E-05 |
| CR455921                                                                                    | Bt.62548   | similar to Os08g0528700                                                                                                                                     | LOC509824          | LOC509824         | 1.2518E+00  | 6.1728E-05 |
| NG010008B20G10                                                                              | Hs.135087  | Transcribed locus                                                                                                                                           | 0                  | 0                 | -1.1146E+00 | 5.9173E-05 |
| CN435991                                                                                    | Hs.213424  | secreted frizzled-related protein 1                                                                                                                         | SFRP1              | SFRP1             | 1.1116E+00  | 4.7986E-05 |
| AW267007                                                                                    | Hs.591346  | connective tissue growth factor                                                                                                                             | CTGF               | CTGF              | -9.5174E-01 | 4.7986E-05 |
| CN433430                                                                                    | Hs.533566  | hypothetical LOC511905                                                                                                                                      | LOC511905          | H19               | 1.7038E+00  | 1.8307E-05 |
| CK845888                                                                                    | Hs.77348   | hydroxyprostaglandin dehydrogenase 15-(NAD)                                                                                                                 | PGDH               | HPGD              | -1.4004E+00 | 1.8307E-05 |
| BF043081                                                                                    | Hs.336564  | hypothetical LOC618274                                                                                                                                      | LOC618274          | SLC16A11          | -1.3011E+00 | 1.8307E-05 |
| CN440346                                                                                    | Hs.371249  | pleiotrophin                                                                                                                                                | PTN                | PTN               | 1.3369E+00  | 1.0039E-04 |
| NM_174641                                                                                   | Hs.77890   | guanylate cyclase 1, soluble, beta 3                                                                                                                        | GUCY1B3            | GUCY1B3           | -1.0239E+00 | 1.6243E-04 |
| CR453604                                                                                    | Mm.396893  | Transcribed locus                                                                                                                                           | 0                  | Ppm1k             | -1.0351E+00 | 1.8255E-04 |
| BF039448                                                                                    | Mm.213114  | Transcribed locus                                                                                                                                           | 0                  | Zkscan1           | -1.0069E+00 | 1.8255E-04 |
| CR453552                                                                                    | Hs.286233  | similar to Sperm surface protein Sp17 (Sperm autoantigenic protein 17) (Sperm protein 17) (Sp17-1)                                                          | LOC616974          | SPA17             | -9.5450E-01 | 2.2815E-04 |
| BF044244                                                                                    | Hs.24553   | stimulated by retinoic acid gene 6 homolog                                                                                                                  | STRA6              | STRA6             | 1.0234E+00  | 2.8670E-04 |
| CK964970                                                                                    | Hs.144442  | similar to Group 10 secretory phospholipase A2 precursor (Group X secretory phospholipase A2) (Phosphatidylcholine 2-acylhydrolase GX) (GX sPLA2) (sPLA2-X) | LOC613966          | LOC653768         | -1.3248E+00 | 4.0732E-04 |
| CR456127                                                                                    | Hs.116471  | similar to OB-cadherin-1                                                                                                                                    | LOC535363          | CDH11             | 7.6543E-01  | 4.0732E-04 |
| CR456025                                                                                    | Hs.74471   | gap junction protein, alpha 1, 43kDa                                                                                                                        | GJA1               | GJA1              | 1.1811E+00  | 4.2098E-04 |
| CN441199                                                                                    | Hs.591446  | similar to mucolipin 2                                                                                                                                      | LOC532671          | MCOLN2            | -1.3525E+00 | 5.5224E-04 |
| CR455905                                                                                    | Hs.513022  | immunoglobulin superfamily containing leucine-rich repeat                                                                                                   | ISLR               | ISLR              | 1.0277E+00  | 5.7756E-04 |

|          |           |                                                                                                        |           |               |             |            |
|----------|-----------|--------------------------------------------------------------------------------------------------------|-----------|---------------|-------------|------------|
| CN438232 | Hs.623905 | Transcribed locus                                                                                      | 0         | DKFZP564O0823 | 8.2619E-01  | 5.7756E-04 |
| CN441890 | Hs.307835 | Transcribed locus, strongly similar to XP_574644.2 similar to phosphoglucomutase 5 [Rattus norvegicus] | 0         | PGM5          | 7.4363E-01  | 5.7756E-04 |
| CN434722 | Hs.436944 | similar to sprouty-like protein                                                                        | LOC507095 | SPRY1         | -6.1266E-01 | 5.7756E-04 |
| CN435237 | Hs.9315   | similar to Olfactomedin-like protein 3 precursor (HNOEL-iso) (hOLF44)                                  | MGC140634 | OLFML3        | 9.3794E-01  | 5.9171E-04 |
| CN438961 | Hs.591225 | similar to chromosome 13 open reading frame 14                                                         | LOC507622 | FRY           | -9.1199E-01 | 6.0566E-04 |
| BF440380 | Hs.591492 | similar to IL-6 receptor alpha chain                                                                   | LOC507359 | IL6R          | -9.2635E-01 | 6.7510E-04 |
| BM362277 | Hs.78944  | similar to regulator of G-protein signalling 2, 24kDa                                                  | MGC140786 | RGS2          | 1.1738E+00  | 7.1809E-04 |
| CR456031 | Hs.465102 | similar to Lipase, endothelial                                                                         | LOC509808 | LIPG          | 8.1345E-01  | 7.6214E-04 |
| AW464520 | Hs.470538 | Transcribed locus                                                                                      | 0         | LRP2          | -1.1950E+00 | 8.0506E-04 |
| CR454408 | Hs.647774 | Transcribed locus                                                                                      | 0         | RHOA          | 7.4033E-01  | 8.1374E-04 |
| BF042234 | Hs.525589 | similar to Os08g0528700                                                                                | LOC509824 | MEG3          | 1.2055E+00  | 8.6768E-04 |
| BF043148 | Hs.63348  | similar to emilin                                                                                      | LOC540451 | EMILIN1       | 6.8183E-01  | 8.7067E-04 |
| CN434170 | Hs.111779 | secreted protein, acidic, cysteine-rich                                                                | SPARC     | SPARC         | 7.2740E-01  | 8.8014E-04 |
| BM254705 | Hs.631975 | similar to zinc transporter 5                                                                          | LOC508169 | SLC30A5       | -6.4613E-01 | 9.3023E-04 |
| CN437486 | Hs.514292 | similar to HOXB8                                                                                       | LOC785855 | HOXB8         | -9.5610E-01 | 9.4395E-04 |
| CN438129 | Hs.438102 | insulin-like growth factor binding protein 2, 36kDa                                                    | IGFBP2    | IGFBP2        | 6.3912E-01  | 9.4395E-04 |
| BF040290 | Hs.651131 | similar to T-box 2 transcription factor; Tbx2                                                          | LOC535982 | TBX2          | 5.4725E-01  | 9.4395E-04 |
| CR455818 | Hs.517937 | similar to ALS2 C-terminal like                                                                        | LOC506969 | ALS2CL        | -5.7868E-01 | 9.5245E-04 |
| CR452675 | Hs.18676  | similar to Sprouty homolog 2 (Spry-2)                                                                  | MGC139477 | SPRY2         | -5.7740E-01 | 1.1501E-03 |
| BF045944 | Hs.40499  | similar to Dickkopf-1 (hdkk-1)                                                                         | LOC504445 | DKK1          | 7.1856E-01  | 1.4245E-03 |
| BF043289 | Hs.291000 | protein phosphatase 1K (PP2C domain containing)                                                        | PPM1K     | PPM1K         | -6.8326E-01 | 1.4400E-03 |
| CN438035 | Hs.502745 | hypothetical LOC521822                                                                                 | MGC142759 | FADS2         | -5.9334E-01 | 1.4400E-03 |
| AW289233 | Hs.104672 | similar to downregulated in ovarian cancer 1                                                           | LOC504954 | FILIP1L       | -7.2438E-01 | 1.5338E-03 |
| BF045639 | Hs.483473 | similar to Chromosome 5 open reading frame 5                                                           | LOC540987 | C5orf5        | 1.0598E+00  | 1.5696E-03 |
| CK940257 | Hs.49765  | similar to very long-chain acyl-CoA synthetase homolog 1; VLCS-H1                                      | LOC537062 | SLC27A6       | -8.4976E-01 | 1.5696E-03 |
| BF041512 | Hs.97270  | family with sequence similarity 13, member A1                                                          | FAM13A1   | FAM13A1       | -6.4112E-01 | 1.5696E-03 |
| CO880387 | Hs.118400 | fascin homolog 1, actin-bundling protein (Strongylocentrotus purpuratus)                               | FSCN1     | FSCN1         | 6.8978E-01  | 1.6037E-03 |
| BF046352 | Hs.440168 | Down syndrome critical region gene 1-like 1                                                            | DSCR1L1   | DSCR1L1       | 6.1774E-01  | 1.6341E-03 |
| CN437988 | Hs.430849 | similar to KIAA1451 protein                                                                            | LOC533350 | OSBPL8        | -7.8323E-01 | 1.8083E-03 |

|               |           |                                                                         |           |           |             |            |
|---------------|-----------|-------------------------------------------------------------------------|-----------|-----------|-------------|------------|
| CN440001      | Hs.495912 | Transcribed locus                                                       | 0         | DMD       | -1.0384E+00 | 1.8277E-03 |
| BF043800      | Hs.365706 | matrix Gla protein                                                      | MGP       | MGP       | -8.4021E-01 | 1.8277E-03 |
| AW426525      | Hs.252387 | Transcribed locus                                                       | 0         | CELSR1    | -9.0296E-01 | 1.8970E-03 |
| CR452782      | Hs.125180 | Transcribed locus                                                       | 0         | GHR       | 5.8597E-01  | 1.9170E-03 |
| CN439877      | Hs.435132 | Transcribed locus                                                       | 0         | 0         | 6.6835E-01  | 2.1195E-03 |
| CN434840      | Bt.44713  | hypothetical LOC617368                                                  | LOC617368 | LOC617368 | -6.2364E-01 | 2.1689E-03 |
| BU01001X1E09  | Hs.360174 | snail homolog 2 (Drosophila)                                            | SNAI2     | SNAI2     | 6.1336E-01  | 2.1689E-03 |
| BF044113      | Hs.142074 | hypothetical LOC506267                                                  | LOC506267 | RNF149    | -7.5861E-01 | 2.1776E-03 |
| CN438563      | Hs.370359 | Transcribed locus                                                       | 0         | NFIB      | -9.0501E-01 | 2.1791E-03 |
| BF043758      | Hs.473761 | reticulon 3                                                             | RTN3      | RTN3      | -6.7893E-01 | 2.1791E-03 |
| CR452206      | Hs.389137 | microfibrillar-associated protein 2                                     | MFAP2     | MFAP2     | 7.2697E-01  | 2.2274E-03 |
| NM_173879     | Hs.30054  | coagulation factor V (proaccelerin, labile factor)                      | F5        | F5        | -7.2189E-01 | 2.2274E-03 |
| CN436615      | Hs.289795 | similar to Fetal brain protein 239 (239FB)                              | MGC143166 | MPPED2    | -6.6922E-01 | 2.2274E-03 |
| AW464762      | Bt.4137   | similar to Putative lymphocyte G0/G1 switch protein 2                   | LOC507436 | LOC507436 | 6.6158E-01  | 2.2762E-03 |
| CR455736      | Hs.512235 | similar to inositol 1,4,5-trisphosphate receptor type 2                 | LOC781844 | ITPR2     | -7.6932E-01 | 2.2936E-03 |
| CN438716      | Hs.193825 | protein phosphatase 2 (formerly 2A), regulatory subunit B, beta isoform | PPP2R2B   | PPP2R2B   | 7.4983E-01  | 2.3404E-03 |
| NM_174653     | Hs.369009 | solute carrier family 18 (vesicular monoamine), member 2                | SLC18A2   | SLC18A2   | -1.1589E+00 | 2.3938E-03 |
| BF440410      | Bt.40266  | similar to KIAA0351                                                     | LOC616166 | LOC616166 | -9.2937E-01 | 2.4867E-03 |
| CR456332      | Hs.441664 | transmembrane 4 superfamily member 2                                    | TM4SF2    | TSPAN7    | 8.2669E-01  | 2.4894E-03 |
| CR551755      | Hs.446352 | similar to epidermal growth factor receptor type 2                      | LOC505709 | ERBB2     | -5.7548E-01 | 2.5454E-03 |
| TC226667      | Hs.155651 | hepatocyte nuclear factor 3 beta                                        | HNF-3b    | FOXA2     | -8.8961E-01 | 2.6591E-03 |
| CR452945      | Hs.652779 | collagen, type I, alpha 1                                               | COL1A1    | COL1A1    | 7.8123E-01  | 2.7311E-03 |
| CN434373      | Hs.642735 | villin 2                                                                | VIL2      | VIL2      | -6.8707E-01 | 2.7311E-03 |
| CN438657      | Hs.643864 | spondin 1, extracellular matrix protein                                 | SPON1     | SPON1     | 6.5928E-01  | 2.7311E-03 |
| BP240034B20E5 | 0         | 0                                                                       | 0         | 0         | -6.0791E-01 | 2.7311E-03 |
| AW461871      | Hs.631975 | similar to zinc transporter 5                                           | LOC508169 | SLC30A5   | -5.9514E-01 | 2.7311E-03 |
| CN439380      | Hs.631988 | discoidin domain receptor family, member 1                              | DDR1      | DDR1      | -5.2775E-01 | 2.7311E-03 |
| CR453485      | Hs.1227   | delta-aminolevulinic acid dehydratase                                   | ALAD      | ALAD      | -7.8885E-01 | 2.7538E-03 |
| BM366427      | Hs.517581 | heme oxygenase (decycling) 1                                            | HMOX1     | HMOX1     | 5.2563E-01  | 2.7969E-03 |
| CN438141      | Hs.405662 | cellular retinoic acid binding protein 2                                | CRABP2    | CRABP2    | 7.4553E-01  | 2.8548E-03 |
| BF044858      | Hs.279529 | px19-like protein                                                       | PX19      | PRELID1   | 6.2373E-01  | 2.8548E-03 |
| AW266934      | Hs.54457  | CD81 molecule                                                           | CD81      | CD81      | 4.6248E-01  | 2.8794E-03 |

|                |           |                                                                               |           |           |             |            |
|----------------|-----------|-------------------------------------------------------------------------------|-----------|-----------|-------------|------------|
| CN438229       | Hs.592121 | similar to RABEP1 protein                                                     | LOC504785 | RABEP1    | -6.4087E-01 | 2.9424E-03 |
| BF042149       | Hs.594846 | Transcribed locus                                                             | 0         | 0         | 6.3190E-01  | 2.9424E-03 |
| AW463906       | Hs.527412 | similar to N-acylsphingosine amidohydrolase (acid ceramidase) 1 preproprotein | MGC140781 | ASAH1     | -5.6194E-01 | 2.9424E-03 |
| NG010005A10E01 | Bt.64621  | Transcribed locus                                                             | 0         | 0         | 5.4038E-01  | 2.9424E-03 |
| BF044250       | Hs.458355 | complement component 1, s subcomponent                                        | C1S       | C1S       | 6.0204E-01  | 2.9673E-03 |
| CR452494       | Hs.489142 | collagen, type I, alpha 2                                                     | COL1A2    | COL1A2    | 7.0794E-01  | 2.9760E-03 |
| BF044010       | Hs.296049 | microfibrillar-associated protein 4                                           | MFAP4     | MFAP4     | 6.8109E-01  | 2.9760E-03 |
| AW465622       | Hs.5258   | similar to melanoma antigen family D, 1                                       | MGC128691 | MAGED1    | 4.1614E-01  | 3.1734E-03 |
| CN439459       | Hs.446240 | similar to transcriptional repressor BSR/RACK7/PRKCBP1                        | LOC506031 | ZMYND8    | -6.1249E-01 | 3.2057E-03 |
| CN436316       | Hs.646304 | spermine synthase                                                             | SMS       | LOC642590 | -7.2776E-01 | 3.2830E-03 |
| CN438559       | Bt.21448  | similar to mFLJ00098 protein                                                  | LOC528038 | LOC528038 | -5.8808E-01 | 3.2830E-03 |
| CN433682       | Hs.87385  | hypothetical LOC509253                                                        | MGC152190 | C7orf30   | 4.4654E-01  | 3.2830E-03 |
| CN439090       | Mm.4913   | Transcribed locus                                                             | 0         | Fst       | 8.6903E-01  | 3.5330E-03 |
| BP260004000A04 | 0         | 0                                                                             | 0         | 0         | -7.7173E-01 | 3.5330E-03 |
| CR453526       | Hs.500842 | similar to meningioma-expressed antigen 5                                     | LOC538561 | MGEA5     | -5.3759E-01 | 3.5330E-03 |
| CN435450       | Hs.592355 | glyceraldehyde-3-phosphate dehydrogenase                                      | GAPD      | GAPDH     | 6.4289E-01  | 3.6155E-03 |
| BP260004000G12 | 0         | 0                                                                             | 0         | 0         | 7.5101E-01  | 3.6913E-03 |
| BF042803       | Hs.470654 | cell division cycle associated 7                                              | CDCA7     | CDCA7     | -6.4926E-01 | 3.7639E-03 |
| NM_181003      | Hs.315369 | aquaporin 4                                                                   | AQP4      | AQP4      | -7.4031E-01 | 3.8808E-03 |

**Top list of the 100 most regulated genes in the [C vs. IC] profiles -IVF-ET pregnancies-**

|          |           |                                                                                                      |           |               |             |            |
|----------|-----------|------------------------------------------------------------------------------------------------------|-----------|---------------|-------------|------------|
| CR452494 | Hs.489142 | collagen, type I, alpha 2                                                                            | COL1A2    | COL1A2        | 1.0053E+00  | 1.1934E-05 |
| CN435991 | Hs.213424 | secreted frizzled-related protein 1                                                                  | SFRP1     | SFRP1         | 1.1655E+00  | 1.4143E-05 |
| CR454408 | Hs.647774 | Transcribed locus                                                                                    | 0         | RHOA          | 1.1399E+00  | 1.4143E-05 |
| BF043081 | Hs.336564 | hypothetical LOC618274                                                                               | LOC618274 | SLC16A11      | -1.6754E+00 | 1.7935E-05 |
| AW464411 | Hs.105547 | Transcribed locus, moderately similar to XP_001233959.1 similar to LOC446973 protein [Gallus gallus] | 0         | NPDC1         | -8.3500E-01 | 1.7935E-05 |
| CN438817 | Hs.494312 | similar to neurotrophic tyrosine kinase, receptor, type 2 isoform a precursor                        | MGC140769 | NTRK2         | 8.2055E-01  | 1.7935E-05 |
| AW267007 | Hs.591346 | connective tissue growth factor                                                                      | CTGF      | CTGF          | -1.3600E+00 | 1.8476E-05 |
| CR456025 | Hs.74471  | gap junction protein, alpha 1, 43kDa                                                                 | GJA1      | GJA1          | 1.9106E+00  | 2.7655E-07 |
| CN438232 | Hs.623905 | Transcribed locus                                                                                    | 0         | DKFZP564O0823 | 9.7034E-01  | 2.9126E-05 |

|                |           |                                                                                                                         |           |           |             |            |
|----------------|-----------|-------------------------------------------------------------------------------------------------------------------------|-----------|-----------|-------------|------------|
| CR454927       | Hs.604502 | phosphoinositide-3-kinase, regulatory subunit 1 (p85 alpha)                                                             | PIK3R1    | PIK3R1    | 8.7646E-01  | 2.9126E-05 |
| CR553514       | Hs.591502 | hypothetical protein LOC788353                                                                                          | LOC788353 | KIAA1522  | -8.1621E-01 | 2.9126E-05 |
| CN439660       | Hs.376071 | Transcribed locus                                                                                                       | 0         | CCND2     | 7.8995E-01  | 2.9126E-05 |
| CN440346       | Hs.371249 | pleiotrophin                                                                                                            | PTN       | PTN       | 1.6638E+00  | 3.0499E-06 |
| CN435237       | Hs.9315   | similar to Olfactomedin-like protein 3 precursor (HNOEL-iso) (hOLF44)                                                   | MGC140634 | OLFML3    | 8.9028E-01  | 6.2943E-05 |
| CN439380       | Hs.631988 | discoidin domain receptor family, member 1                                                                              | DDR1      | DDR1      | -8.1498E-01 | 6.4153E-05 |
| AW461804       | Hs.17631  | Transcribed locus                                                                                                       | 0         | FZD5      | -1.2662E+00 | 7.9125E-05 |
| CN441848       | Hs.436657 | clusterin                                                                                                               | CLU       | CLU       | -8.7536E-01 | 8.5152E-05 |
| CN441033       | Hs.233240 | similar to alpha 3 type VI collagen isoform 5 precursor                                                                 | LOC530657 | COL6A3    | 9.7158E-01  | 9.2616E-05 |
| BF440410       | Bt.40266  | similar to KIAA0351                                                                                                     | LOC616166 | LOC616166 | -1.1234E+00 | 1.2116E-04 |
| BM362277       | Hs.78944  | similar to regulator of G-protein signalling 2, 24kDa                                                                   | MGC140786 | RGS2      | 1.1850E+00  | 1.6638E-04 |
| CN438716       | Hs.193825 | protein phosphatase 2 (formerly 2A), regulatory subunit B, beta isoform                                                 | PPP2R2B   | PPP2R2B   | 7.9833E-01  | 1.6638E-04 |
| BF045639       | Hs.483473 | similar to Chromosome 5 open reading frame 5                                                                            | LOC540987 | C5orf5    | 1.2590E+00  | 2.1554E-04 |
| BU01001X1E09   | Hs.360174 | snail homolog 2 (Drosophila)                                                                                            | SNAI2     | SNAI2     | 6.8351E-01  | 2.1554E-04 |
| CN439090       | Mm.4913   | Transcribed locus                                                                                                       | 0         | Fst       | 6.9289E-01  | 3.1005E-04 |
| CN438657       | Hs.643864 | spondin 1, extracellular matrix protein                                                                                 | SPON1     | SPON1     | 1.0203E+00  | 3.2332E-04 |
| BF039332       | Hs.15250  | peroxisomal D3,D2-enoyl-CoA isomerase                                                                                   | PECI      | PECI      | -7.6397E-01 | 3.2332E-04 |
| CR452206       | Hs.389137 | microfibrillar-associated protein 2                                                                                     | MFAP2     | MFAP2     | 7.2544E-01  | 3.2332E-04 |
| CR456332       | Hs.441664 | transmembrane 4 superfamily member 2                                                                                    | TM4SF2    | TSPAN7    | 1.0789E+00  | 3.2969E-04 |
| CR453068       | Hs.443572 | solute carrier family 22 (organic cation transporter), member 5                                                         | SLC22A5   | SLC22A5   | -9.9528E-01 | 3.7405E-04 |
| CR552676       | Hs.443625 | similar to Collagen alpha 1(III) chain precursor                                                                        | LOC510833 | COL3A1    | 1.1595E+00  | 3.7521E-04 |
| CN438217       | Hs.445827 | similar to procollagen alpha 2(V)                                                                                       | LOC782818 | COL5A2    | 8.0226E-01  | 3.7521E-04 |
| CR454381       | Hs.74405  | tyrosine 3-monooxygenase/tryptophan 5-monooxygenase activation protein, theta polypeptide                               | YWHAQ     | YWHAQ     | 6.1823E-01  | 4.2227E-04 |
| BP260004000A04 | Hs.86859  | similar to Growth factor receptor-bound protein 7 (GRB7 adapter protein) (Epidermal growth factor receptor GRB-7) (B47) | MGC138032 | GRB7      | -1.1278E+00 | 4.2587E-04 |
| CN432616       | Hs.460238 | SH3-domain GRB2-like endophilin B2                                                                                      | SH3GLB2   | SH3GLB2   | -7.0449E-01 | 4.3820E-04 |
| BF044244       | Hs.24553  | stimulated by retinoic acid gene 6 homolog                                                                              | STRA6     | STRA6     | 1.0040E+00  | 4.7290E-04 |
| NG010008B10D01 | Hs.195471 | 6-phosphofructo-2-kinase                                                                                                | LOC407183 | PFKFB3    | -8.7117E-01 | 4.8937E-04 |
| CN437423       | Hs.436792 | LIM domain only 4                                                                                                       | LMO4      | LMO4      | 5.7848E-01  | 5.2862E-04 |
| BF040198       | Hs.87435  | similar to Rho guanine exchange factor (GEF) 16                                                                         | LOC514453 | ARHGEF16  | -8.6187E-01 | 5.3783E-04 |

|                |           |                                                                                                                                |           |          |             |            |
|----------------|-----------|--------------------------------------------------------------------------------------------------------------------------------|-----------|----------|-------------|------------|
| CR553024       | Hs.368631 | similar to Rho GTPase activating protein 10                                                                                    | MGC143451 | ARHGAP10 | 6.9748E-01  | 5.3783E-04 |
| CN438295       | Hs.289347 | SDR1 protein                                                                                                                   | SDR1      | DHRS3    | -6.6846E-01 | 5.3783E-04 |
| BF440380       | Hs.591492 | similar to IL-6 receptor alpha chain                                                                                           | LOC507359 | IL6R     | -1.2269E+00 | 5.4373E-04 |
| CR456127       | Hs.116471 | similar to OB-cadherin-1                                                                                                       | LOC535363 | CDH11    | 6.9774E-01  | 5.7486E-04 |
| CR453485       | Hs.1227   | delta-aminolevulinic acid dehydratase                                                                                          | ALAD      | ALAD     | -9.5697E-01 | 5.9579E-04 |
| CK817076       | Hs.409602 | similar to sulfatase 1                                                                                                         | LOC535166 | SULF1    | 7.6844E-01  | 5.9579E-04 |
| CN437699       | Hs.653146 | similar to Receptor-type tyrosine-protein phosphatase S precursor (R-PTP-S) (Protein-tyrosine phosphatase sigma) (R-PTP-sigma) | LOC537480 | PTPRS    | 6.8657E-01  | 5.9579E-04 |
| CR454452       | Hs.501012 | similar to Gamma adducin (Adducin-like protein 70)                                                                             | MGC139783 | ADD3     | 6.0876E-01  | 5.9579E-04 |
| CR553566       | Hs.529901 | Transcribed locus                                                                                                              | 0         | XIST     | 6.7575E-01  | 6.0441E-04 |
| CK729574       | Hs.487036 | Transcribed locus                                                                                                              | 0         | MYO5C    | -6.6158E-01 | 6.0441E-04 |
| NR_001464      | Hs.529901 | Transcribed locus                                                                                                              | 0         | XIST     | 5.6318E-01  | 6.0441E-04 |
| AW426525       | Hs.252387 | Transcribed locus                                                                                                              | 0         | CELSR1   | -9.0382E-01 | 6.7178E-04 |
| CR552920       | Hs.62886  | similar to SPARC-like protein 1 precursor (High endothelial venule protein) (Hevin) (MAST 9)                                   | MGC127494 | SPARCL1  | 5.8312E-01  | 6.8941E-04 |
| CR456031       | Hs.465102 | similar to Lipase, endothelial                                                                                                 | LOC509808 | LIPG     | 6.6763E-01  | 7.7283E-04 |
| BM364277       | Hs.494312 | similar to neurotrophic tyrosine kinase, receptor, type 2 isoform a precursor                                                  | MGC140769 | NTRK2    | 7.5676E-01  | 8.4999E-04 |
| BF043758       | Hs.473761 | reticulon 3                                                                                                                    | RTN3      | RTN3     | -7.1336E-01 | 8.4999E-04 |
| CK729436       | Hs.249171 | similar to homeobox A11                                                                                                        | LOC533625 | HOXA11   | 8.2090E-01  | 9.2034E-04 |
| BF041512       | Hs.97270  | family with sequence similarity 13, member A1                                                                                  | FAM13A1   | FAM13A1  | -9.6509E-01 | 1.0035E-03 |
| CN440001       | Hs.495912 | Transcribed locus                                                                                                              | 0         | DMD      | -1.0742E+00 | 1.0912E-03 |
| CN433683       | Hs.567425 | similar to KIAA0979 protein                                                                                                    | LOC533890 | APRIN    | 6.2839E-01  | 1.0912E-03 |
| CN437486       | Hs.514292 | similar to HOXB8                                                                                                               | LOC785855 | HOXB8    | -1.0147E+00 | 1.1233E-03 |
| CR453604       | Mm.396893 | Transcribed locus                                                                                                              | 0         | Ppm1k    | -9.4309E-01 | 1.1890E-03 |
| NG010008B20G10 | Hs.135087 | Transcribed locus                                                                                                              | 0         | 0        | -1.1348E+00 | 1.2273E-03 |
| CR456002       | Hs.441047 | adrenomedullin                                                                                                                 | ADM       | ADM      | 6.1389E-01  | 1.2273E-03 |
| BF040130       | Hs.89603  | mucin 1, cell surface associated                                                                                               | MUC1      | MUC1     | -1.1849E+00 | 1.2368E-03 |
| BM285943       | Hs.154654 | Transcribed locus                                                                                                              | 0         | CYP1B1   | 9.0744E-01  | 1.2368E-03 |
| X14064         | Hs.249211 | uncoupling protein 1                                                                                                           | UCP1      | UCP1     | -6.7345E-01 | 1.2368E-03 |
| CK845888       | Hs.77348  | hydroxyprostaglandin dehydrogenase 15-(NAD)                                                                                    | PGDH      | HPGD     | -1.2201E+00 | 1.3869E-03 |
| CR455905       | Hs.513022 | immunoglobulin superfamily containing leucine-rich repeat                                                                      | ISLR      | ISLR     | 8.3950E-01  | 1.4196E-03 |

|               |           |                                                                                                                                                                            |           |           |             |            |
|---------------|-----------|----------------------------------------------------------------------------------------------------------------------------------------------------------------------------|-----------|-----------|-------------|------------|
| CN436911      | Hs.352298 | Transcribed locus                                                                                                                                                          | 0         | PDGFD     | 6.1392E-01  | 1.4196E-03 |
| CN438035      | Hs.502745 | hypothetical LOC521822                                                                                                                                                     | MGC142759 | FADS2     | -1.1363E+00 | 1.4226E-03 |
| BF039448      | Mm.213114 | Transcribed locus                                                                                                                                                          | 0         | Zkscan1   | -8.5343E-01 | 1.5166E-03 |
| BP240034B20E5 | Hs.75514  | nucleoside phosphorylase                                                                                                                                                   | NP        | NP        | -6.9523E-01 | 1.5166E-03 |
| BF046516      | Hs.504315 | suppression of tumorigenicity 14                                                                                                                                           | ST14      | ST14      | -9.6277E-01 | 1.5436E-03 |
| BF046404      | Hs.654358 | Transcribed locus                                                                                                                                                          | 0         | PDE4D     | 5.8797E-01  | 1.5436E-03 |
| CN433188      | Hs.501012 | Transcribed locus                                                                                                                                                          | 0         | ADD3      | 5.4896E-01  | 1.5968E-03 |
| CN434373      | Hs.642735 | villin 2                                                                                                                                                                   | VIL2      | VIL2      | -1.0139E+00 | 1.6289E-03 |
| BF043392      | Hs.3989   | similar to KIAA0315                                                                                                                                                        | LOC508175 | PLXNB2    | -5.8684E-01 | 1.6289E-03 |
| BF045795      | Hs.291030 | Transcribed locus, moderately similar to XP_341878.3 similar to Ras GTPase-activating-like protein IQGAP1 [Rattus norvegicus]                                              | 0         | IQGAP2    | -8.2642E-01 | 1.6554E-03 |
| BF039306      | Hs.137459 | hypothetical LOC514577                                                                                                                                                     | LOC514577 | SHROOM3   | -9.7516E-01 | 1.6823E-03 |
| BF440504      | Hs.334846 | herpesvirus entry mediator C                                                                                                                                               | HVEC      | PVRL1     | -5.9064E-01 | 1.6823E-03 |
| AW465865      | Mm.24684  | hypothetical LOC509889                                                                                                                                                     | LOC509889 | Fosl2     | 4.9543E-01  | 1.6823E-03 |
| CN440086      | Hs.487200 | similar to SMAP-2b                                                                                                                                                         | LOC615490 | SMOC2     | 5.3795E-01  | 1.7076E-03 |
| NM_174837     | Hs.355264 | cytochrome b-561                                                                                                                                                           | CYB561    | CYB561    | -9.5592E-01 | 1.7330E-03 |
| CN441890      | Hs.307835 | Transcribed locus, strongly similar to XP_574644.2 similar to phosphoglucomutase 5 [Rattus norvegicus]                                                                     | 0         | PGM5      | 6.0138E-01  | 1.7594E-03 |
| CN433682      | Hs.87385  | hypothetical LOC509253                                                                                                                                                     | MGC152190 | C7orf30   | 5.8435E-01  | 1.8248E-03 |
| CR456217      | Hs.289044 | similar to F26E4.12                                                                                                                                                        | MGC133953 | LOC493869 | 5.8700E-01  | 1.8259E-03 |
| CN435936      | Hs.313    | secreted phosphoprotein 1                                                                                                                                                  | SPP1      | SPP1      | 1.4869E+00  | 1.8675E-03 |
| CR451698      | 0         | 0                                                                                                                                                                          | 0         | 0         | -7.4592E-01 | 1.8675E-03 |
| CR453269      | Hs.448588 | similar to pp21 homolog                                                                                                                                                    | LOC787302 | NGFRAP1   | 4.6313E-01  | 1.8675E-03 |
| CN433430      | Hs.533566 | hypothetical LOC511905                                                                                                                                                     | LOC511905 | H19       | 1.3772E+00  | 1.8952E-03 |
| CK964970      | Hs.144442 | similar to Group 10 secretory phospholipase A2 precursor (Group X secretory phospholipase A2) (Phosphatidylcholine 2-acylhydrolase GX) (GX sPLA2) (sPLA2-X)                | LOC613966 | LOC653768 | -1.2696E+00 | 1.8952E-03 |
| BF045037      | Hs.594952 | desmin                                                                                                                                                                     | DES       | DES       | 6.2559E-01  | 1.8952E-03 |
| BU01001X1B10  | Hs.632641 | similar to Transmembrane emp24 protein transport domain containing 4                                                                                                       | LOC508729 | TMED4     | -5.3319E-01 | 1.8952E-03 |
| CN435377      | Hs.522665 | similar to Melanoma-associated antigen D2 (MAGE-D2 antigen) (MAGE-D) (Breast cancer associated gene 1 protein) (BCG-1) (11B6) (Hepatocellular carcinoma associated protein | MGC139951 | MAGED2    | -8.1382E-01 | 1.8971E-03 |

|                                                                                               |           |                                                                             |           |              |             |            |
|-----------------------------------------------------------------------------------------------|-----------|-----------------------------------------------------------------------------|-----------|--------------|-------------|------------|
|                                                                                               |           | JCL-1)                                                                      |           |              |             |            |
| AW266884                                                                                      | Hs.517168 | Transcribed locus                                                           | 0         | TAGLN2       | -5.4199E-01 | 2.0959E-03 |
| CN438584                                                                                      | Hs.197320 | similar to Transducin-like enhancer of split 1 (E(sp1) homolog, Drosophila) | LOC512888 | TLE1         | -6.2585E-01 | 2.2541E-03 |
| CR453772                                                                                      | Hs.121592 | adaptor-related protein complex 1, sigma 1 subunit                          | AP1S1     | AP1S2        | 6.1088E-01  | 2.3114E-03 |
| CB423417                                                                                      | Hs.187459 | similar to NEW1 domain containing protein                                   | LOC517451 | ZDHHC14      | -5.7535E-01 | 2.3114E-03 |
| BF039544                                                                                      | Hs.514950 | serine carboxypeptidase 1                                                   | SCPEP1    | SCPEP1       | 4.9818E-01  | 2.3114E-03 |
| CR455064                                                                                      | Hs.269512 | follistatin-like 1                                                          | FSTL1     | FSTL1        | 6.7072E-01  | 2.4068E-03 |
| AW461893                                                                                      | Hs.388245 | Transcribed locus                                                           | 0         | HAND2        | 6.2583E-01  | 2.4068E-03 |
| <b>Top list of the 100 most regulated genes in the [C vs. IC] profiles -SCNT pregnancies-</b> |           |                                                                             |           |              |             |            |
| AB008612                                                                                      | 0         | MHC Class I JSP.1                                                           | JSP.1     | LOC652614    | 1.3011E+00  | 1.0679E-06 |
| AW461804                                                                                      | Hs.17631  | Transcribed locus                                                           | 0         | FZD5         | -1.5636E+00 | 9.8419E-09 |
| CR453977                                                                                      | Hs.639    | calbindin 3, (vitamin D-dependent calcium binding protein)                  | CALB3     | S100G        | -1.2767E+00 | 9.5429E-06 |
| CN435450                                                                                      | Hs.592355 | glyceraldehyde-3-phosphate dehydrogenase                                    | GAPD      | GAPDH        | 1.0398E+00  | 9.4512E-05 |
| CN439459                                                                                      | Hs.446240 | similar to transcriptional repressor BSR/RACK7/PRKCBP1                      | LOC506031 | ZMYND8       | -8.1507E-01 | 8.9217E-05 |
| BF040485                                                                                      | 0         | hypothetical LOC525698                                                      | MGC149010 | LOC100008589 | 1.2473E+00  | 8.8664E-05 |
| CR451806                                                                                      | Hs.434937 | peptidylprolyl isomerase B (cyclophilin B)                                  | PPIB      | PPIB         | 1.2492E+00  | 8.6454E-05 |
| BF042234                                                                                      | Hs.525589 | similar to Os08g0528700                                                     | LOC509824 | MEG3         | 1.4888E+00  | 8.2925E-09 |
| BF042229                                                                                      | Hs.645610 | insulin-like growth factor 2                                                | IGF2      | IGF2         | 7.3162E-01  | 8.1699E-05 |
| AW466111                                                                                      | Hs.506997 | ribosomal protein S2e                                                       | RPS2E     | RPS2         | 1.4922E+00  | 8.1246E-09 |
| AW461766                                                                                      | Hs.514477 | similar to lethal giant larvae homolog 2                                    | LOC539545 | LLGL2        | 1.2537E+00  | 8.1090E-05 |
| CR456025                                                                                      | Hs.74471  | gap junction protein, alpha 1, 43kDa                                        | GJA1      | GJA1         | 1.6358E+00  | 8.0962E-12 |
| CR453604                                                                                      | Mm.396893 | Transcribed locus                                                           | 0         | Ppm1k        | -1.1299E+00 | 7.4072E-05 |
| CK940257                                                                                      | Hs.49765  | similar to very long-chain acyl-CoA synthetase homolog 1; VLCS-H1           | LOC537062 | SLC27A6      | -1.2621E+00 | 7.0043E-05 |
| CN441033                                                                                      | Hs.233240 | similar to alpha 3 type VI collagen isoform 5 precursor                     | LOC530657 | COL6A3       | 1.7526E+00  | 6.9481E-11 |
| CR454769                                                                                      | Hs.631549 | similar to selenoprotein W, 1                                               | MGC128106 | SEPW1        | 1.1148E+00  | 6.8337E-05 |
| CN999995                                                                                      | 0         | MHC class I heavy chain                                                     | LOC510417 | LOC652614    | 1.4912E+00  | 6.7719E-06 |
| BF043800                                                                                      | Hs.365706 | matrix Gla protein                                                          | MGP       | MGP          | -1.2187E+00 | 6.7286E-06 |
| BM365043                                                                                      | 0         | POU domain, class 5, transcription factor 1                                 | POU5F1    | LOC652614    | 1.2663E+00  | 6.6364E-05 |
| CK394153                                                                                      | Bt.7533   | similar to Probable cation-transporting ATPase 13A1                         | LOC534369 | LOC534369    | 1.2702E+00  | 6.2075E-05 |



|              |           |                                                                                                                                                             |           |           |             |            |
|--------------|-----------|-------------------------------------------------------------------------------------------------------------------------------------------------------------|-----------|-----------|-------------|------------|
| CR454010     | Hs.374596 | similar to LOC113230 protein                                                                                                                                | LOC539805 | TPT1      | 1.2727E+00  | 5.9853E-05 |
| BCAZ0002aa24 | Hs.568356 | hypothetical protein MGC128198                                                                                                                              | MGC128198 | LOC441632 | 1.1618E+00  | 5.8940E-06 |
| CK964970     | Hs.144442 | similar to Group 10 secretory phospholipase A2 precursor (Group X secretory phospholipase A2) (Phosphatidylcholine 2-acylhydrolase GX) (GX sPLA2) (sPLA2-X) | LOC613966 | LOC653768 | -1.8421E+00 | 5.8882E-12 |
| BF042678     | Bt.4560   | trophoblast Kunitz domain protein 1                                                                                                                         | TKDP1     | TKDP1     | 1.6210E+00  | 5.8501E-07 |
| BF040646     | Bt.262    | trophoblast Kunitz domain protein 3                                                                                                                         | TKDP3     | TKDP3     | 1.6228E+00  | 5.8367E-07 |
| CR452147     | 0         | ribosomal protein L18a                                                                                                                                      | RPL18A    | LOC390354 | 1.2260E+00  | 5.8213E-06 |
| CN439090     | Mm.4913   | Transcribed locus                                                                                                                                           | 0         | Fst       | 1.1100E+00  | 5.8180E-06 |
| CN432245     | Hs.274313 | insulin-like growth factor binding protein 6                                                                                                                | IGFBP6    | IGFBP6    | 1.3396E+00  | 5.8107E-08 |
| CN435833     | Bt.26852  | similar to Fetal brain protein 239 (239FB)                                                                                                                  | MGC143166 | MGC143166 | -1.2419E+00 | 4.6427E-06 |
| BF042887     | Hs.374650 | hypothetical protein LOC777595                                                                                                                              | LOC777595 | IFITM3    | 1.2670E+00  | 4.4943E-07 |
| CN435237     | Hs.9315   | similar to Olfactomedin-like protein 3 precursor (HNOEL-iso) (hOLF44)                                                                                       | MGC140634 | OLFML3    | 1.3084E+00  | 4.2817E-06 |
| TC226667     | Hs.155651 | hepatocyte nuclear factor 3 beta                                                                                                                            | HNF-3b    | FOXA2     | -1.2987E+00 | 3.7644E-06 |
| CR455921     | Bt.62548  | similar to Os08g0528700                                                                                                                                     | LOC509824 | LOC509824 | 1.4281E+00  | 3.7525E-08 |
| AW464520     | Hs.470538 | Transcribed locus                                                                                                                                           | 0         | LRP2      | -1.4167E+00 | 3.5560E-06 |
| CN438961     | Hs.591225 | similar to chromosome 13 open reading frame 14                                                                                                              | LOC507622 | FRY       | -1.3153E+00 | 3.5560E-06 |
| AW266934     | Hs.54457  | CD81 molecule                                                                                                                                               | CD81      | CD81      | 1.4321E+00  | 3.5074E-08 |
| CR552385     | Hs.45002  | similar to Rac3                                                                                                                                             | LOC619066 | RAC3      | 1.0860E+00  | 3.5059E-05 |
| BF044250     | Hs.458355 | complement component 1, s subcomponent                                                                                                                      | C1S       | C1S       | 1.6047E+00  | 3.4838E-10 |
| CR550906     | Hs.433839 | eukaryotic translation elongation factor 1 alpha 2                                                                                                          | EEF1A2    | EEF1A2    | 1.1898E+00  | 3.3236E-06 |
| BF044244     | Hs.24553  | stimulated by retinoic acid gene 6 homolog                                                                                                                  | STRA6     | STRA6     | 1.2278E+00  | 2.7254E-07 |
| AW461452     | Hs.621772 | msh homeobox 1                                                                                                                                              | MSX1      | MSX1      | -1.1950E+00 | 2.5110E-05 |
| AW463491     | Hs.517033 | transglutaminase 2 (C polypeptide, protein-glutamine-gamma-glutamyltransferase)                                                                             | TGM2      | TGM2      | 1.0993E+00  | 2.5110E-05 |
| CN441199     | Hs.591446 | similar to mucolipin 2                                                                                                                                      | LOC532671 | MCOLN2    | -1.2364E+00 | 2.3269E-05 |
| CK845888     | Hs.77348  | hydroxyprostaglandin dehydrogenase 15-(NAD)                                                                                                                 | PGDH      | HPGD      | -1.6359E+00 | 2.1860E-08 |
| CN436316     | Hs.646304 | spermine synthase                                                                                                                                           | SMS       | LOC642590 | -1.0523E+00 | 2.1064E-05 |
| BM363051     | Hs.584756 | fatty acid binding protein ( heart ) like                                                                                                                   | FABP      | FABP3     | 1.2103E+00  | 1.8936E-06 |
| BM366029     | Hs.77961  | similar to MHC class 1                                                                                                                                      | LOC782684 | LOC732037 | 1.4517E+00  | 1.8517E-07 |
| AW461469     | Hs.384598 | serpin peptidase inhibitor, clade G (C1 inhibitor), member 1, (angioedema, hereditary)                                                                      | SERPING1  | SERPING1  | 1.1141E+00  | 1.8265E-05 |

|                |           |                                                                                                                               |           |           |             |            |
|----------------|-----------|-------------------------------------------------------------------------------------------------------------------------------|-----------|-----------|-------------|------------|
| CR455905       | Hs.513022 | immunoglobulin superfamily containing leucine-rich repeat                                                                     | ISLR      | ISLR      | 1.6145E+00  | 1.7758E-08 |
| CR552676       | Hs.443625 | similar to Collagen alpha 1(III) chain precursor                                                                              | LOC510833 | COL3A1    | 1.6414E+00  | 1.7391E-09 |
| NM_174641      | Hs.77890  | guanylate cyclase 1, soluble, beta 3                                                                                          | GUCY1B3   | GUCY1B3   | -1.5794E+00 | 1.7391E-09 |
| BM363693       | 0         | IgG1 heavy chain constant region                                                                                              | IGG1C     | 0         | 1.4631E+00  | 1.7391E-09 |
| CR454705       | Hs.82916  | ribosomal protein S5                                                                                                          | RPS5      | CCT6A     | 1.1785E+00  | 1.7025E-05 |
| CN434373       | Hs.642735 | villin 2                                                                                                                      | VIL2      | VIL2      | -1.1783E+00 | 1.7025E-05 |
| BM362277       | Hs.78944  | similar to regulator of G-protein signalling 2, 24kDa                                                                         | MGC140786 | RGS2      | 1.1516E+00  | 1.7025E-05 |
| AW426525       | Hs.252387 | Transcribed locus                                                                                                             | 0         | CELSR1    | -1.1836E+00 | 1.6759E-06 |
| NG010008B20G10 | Hs.135087 | Transcribed locus                                                                                                             | 0         | 0         | -1.5498E+00 | 1.6575E-08 |
| AW267007       | Hs.591346 | connective tissue growth factor                                                                                               | CTGF      | CTGF      | -1.2488E+00 | 1.6560E-07 |
| CN440001       | Hs.495912 | Transcribed locus                                                                                                             | 0         | DMD       | -1.5353E+00 | 1.6188E-09 |
| CN440346       | Hs.371249 | pleiotrophin                                                                                                                  | PTN       | PTN       | 1.7701E+00  | 1.4720E-12 |
| CN435991       | Hs.213424 | secreted frizzled-related protein 1                                                                                           | SFRP1     | SFRP1     | 1.3554E+00  | 1.4129E-06 |
| AW464762       | Bt.4137   | similar to Putative lymphocyte G0/G1 switch protein 2                                                                         | LOC507436 | LOC507436 | 1.1595E+00  | 1.3909E-05 |
| NM_174653      | Hs.369009 | solute carrier family 18 (vesicular monoamine), member 2                                                                      | SLC18A2   | SLC18A2   | -1.9993E+00 | 1.1897E-07 |
| CR454622       | Hs.481022 | secreted frizzled-related protein 2                                                                                           | SFRP2     | SFRP2     | 1.2966E+00  | 1.1693E-06 |
| CN433430       | Hs.533566 | hypothetical LOC511905                                                                                                        | LOC511905 | H19       | 2.4928E+00  | 0.0000E+00 |
| CN436834       | Hs.90572  | similar to transmembrane receptor                                                                                             | LOC514819 | PTK7      | 1.0880E+00  | 1.1206E-04 |
| BF040930       | Hs.517356 | collagen, type XVIII, alpha 1                                                                                                 | COL18a1   | COL18A1   | 1.0875E+00  | 1.1259E-04 |
| CR454927       | Hs.604502 | phosphoinositide-3-kinase, regulatory subunit 1 (p85 alpha)                                                                   | PIK3R1    | PIK3R1    | 1.0851E+00  | 1.1600E-04 |
| CR553024       | Hs.368631 | similar to Rho GTPase activating protein 10                                                                                   | MGC143451 | ARHGAP10  | 1.0846E+00  | 1.1600E-04 |
| CN438657       | Hs.643864 | spondin 1, extracellular matrix protein                                                                                       | SPON1     | SPON1     | 9.8067E-01  | 1.1600E-04 |
| U83020         | Hs.277704 | oxygen regulated protein, 150 kDa                                                                                             | ORP150    | HYOU1     | 1.1479E+00  | 1.2033E-04 |
| BP230035000E10 | Hs.474053 | similar to Collagen, type VI, alpha 1                                                                                         | LOC511422 | COL6A1    | 1.0804E+00  | 1.2381E-04 |
| BF045795       | Hs.291030 | Transcribed locus, moderately similar to XP_341878.3 similar to Ras GTPase-activating-like protein IQGAP1 [Rattus norvegicus] | 0         | IQGAP2    | -1.0767E+00 | 1.3351E-04 |
| CN433245       | Hs.312485 | similar to complement factor I                                                                                                | MGC128240 | CFI       | -1.1033E+00 | 1.4179E-04 |
| CN436615       | Hs.289795 | similar to Fetal brain protein 239 (239FB)                                                                                    | MGC143166 | MPPED2    | -1.0106E+00 | 1.4179E-04 |
| CR453485       | Hs.1227   | delta-aminolevulinic acid dehydratase                                                                                         | ALAD      | ALAD      | -9.5971E-01 | 1.6806E-04 |
| CR455702       | Hs.144835 | eukaryotic translation elongation factor 1 gamma                                                                              | EEF1G     | EEF1G     | 1.1255E+00  | 1.8226E-04 |
| CR455978       | Hs.301853 | RAB34, member RAS oncogene family                                                                                             | RAB34     | RAB34     | 1.2000E+00  | 1.9211E-04 |
| BF039306       | Hs.137459 | hypothetical LOC514577                                                                                                        | LOC514577 | SHROOM3   | -9.8420E-01 | 2.2331E-04 |

|              |           |                                                                                                        |           |         |             |            |
|--------------|-----------|--------------------------------------------------------------------------------------------------------|-----------|---------|-------------|------------|
| CN441344     | Hs.82045  | midkine (neurite growth-promoting factor 2)                                                            | MDK       | MDK     | 9.0814E-01  | 2.6323E-04 |
| CN435195     | Hs.376688 | similar to Usher syndrome 1G protein                                                                   | LOC531104 | USH1G   | 9.8801E-01  | 2.7312E-04 |
| CN441890     | Hs.307835 | Transcribed locus, strongly similar to XP_574644.2 similar to phosphoglucomutase 5 [Rattus norvegicus] | 0         | PGM5    | 8.9981E-01  | 3.1470E-04 |
| BF045344     | 0         | 0                                                                                                      | 0         | 0       | 1.0261E+00  | 3.7795E-04 |
| BF042358     | Hs.45107  | SEC11 homolog C (S. cerevisiae)                                                                        | SEC11C    | SEC11C  | -9.4848E-01 | 4.0977E-04 |
| BF039659     | Hs.381061 | similar to ribosomal protein L19                                                                       | LOC510615 | RPL19   | 1.0794E+00  | 4.4676E-04 |
| CN435808     | Hs.448979 | Transcribed locus                                                                                      | 0         | SLC35A3 | -9.9060E-01 | 4.8035E-04 |
| BF044849     | Hs.80409  | growth arrest and DNA-damage-inducible, alpha                                                          | GADD45A   | GADD45A | -9.6653E-01 | 4.9121E-04 |
| CN437187     | Hs.653181 | similar to Thy-1 cell surface antigen                                                                  | MGC128895 | THY1    | 9.6025E-01  | 4.9121E-04 |
| AJ786345     | Hs.436847 | chloride channel 2                                                                                     | CLCN2     | CLCN2   | 1.0107E+00  | 4.9868E-04 |
| BF044867     | Hs.424552 | ADP-ribosylation factor-like 10                                                                        | ARL10     | ARL10   | 1.0695E+00  | 5.1941E-04 |
| CN434722     | Hs.436944 | similar to sprouty-like protein                                                                        | LOC507095 | SPRY1   | -9.2147E-01 | 5.3847E-04 |
| CN437551     | Hs.46732  | monoamine oxidase B                                                                                    | MAOB      | MAOB    | 7.5971E-01  | 5.3995E-04 |
| AW462280     | Hs.619408 | potassium inwardly-rectifying channel, subfamily J, member 8                                           | KCNJ8     | KCNJ8   | 7.4665E-01  | 5.5134E-04 |
| CN437946     | Hs.516090 | similar to empty spiracles homolog 1                                                                   | LOC539333 | EMX1    | 1.1309E+00  | 6.3439E-04 |
| CR455529     | Hs.528007 | similar to splicing factor U2AF homolog - mouse                                                        | LOC789546 | U2AF2   | 1.0565E+00  | 6.4570E-04 |
| BU01002X1A02 | Hs.479372 | Transcribed locus                                                                                      | 0         | SLC34A2 | -9.7647E-01 | 6.4900E-04 |
| CR455736     | Hs.512235 | similar to inositol 1,4,5-trisphosphate receptor type 2                                                | LOC781844 | ITPR2   | -1.2699E+00 | 7.0220E-04 |
| BF044113     | Hs.142074 | hypothetical LOC506267                                                                                 | LOC506267 | RNF149  | -1.1234E+00 | 7.0220E-04 |
| BF043148     | Hs.63348  | similar to emilin                                                                                      | LOC540451 | EMILIN1 | 1.1087E+00  | 7.2677E-04 |
| CR452246     | Hs.592123 | similar to adipocyte determination and differentiation-dependent factor 1                              | LOC539361 | SREBF1  | 9.8633E-01  | 7.5879E-04 |
