# Supplementary material
Source: PubMed Central journal article supplement (PMC2667091)
Supplement: 0812722106_ST6_PDF.pdf [file 0812722106_ST6_PDF.pdf]

**Table 6.** Most significant IPA Bio-Functions (BF; P < 0.01) for the C vs. IC profiles in AI, IVF-ET, and SCNT pregnancies

| Category                                                           | P-value           | Nb. of genes |
|--------------------------------------------------------------------|-------------------|--------------|
| <b>IPA Biofunction in the [C vs. IC] profiles -AI pregnancies-</b> |                   |              |
| Cellular Growth and Proliferation                                  | 1,92E-08-1,46E-02 | 120          |
| Cellular Movement                                                  | 3,45E-07-1,42E-02 | 69           |
| Cell Death                                                         | 1,22E-06-1,5E-02  | 96           |
| Cellular Development                                               | 1,55E-06-1,33E-02 | 88           |
| Organismal Development                                             | 4,65E-06-1,47E-02 | 65           |
| Tissue Development                                                 | 1,61E-05-1,4E-02  | 76           |
| Tumor Morphology                                                   | 2,79E-05-1,4E-02  | 26           |
| Cardiovascular System Development and Function                     | 4,25E-05-1,42E-02 | 44           |
| Organ Development                                                  | 6,34E-05-1,12E-02 | 47           |
| Organismal Functions                                               | 6,51E-05-1,63E-03 | 7            |
| Cell Morphology                                                    | 1,44E-04-1,47E-02 | 65           |
| Skeletal and Muscular System Development and Function              | 1,77E-04-1,28E-02 | 52           |
| Cell-To-Cell Signaling and Interaction                             | 1,82E-04-1,28E-02 | 41           |
| Connective Tissue Development and Function                         | 1,82E-04-1,35E-02 | 40           |
| Tissue Morphology                                                  | 2,39E-04-1,32E-02 | 26           |
| Organismal Survival                                                | 2,87E-04-1,4E-02  | 48           |
| Organ Morphology                                                   | 3,2E-04-1,4E-02   | 23           |
| Reproductive System Development and Function                       | 5,54E-04-1,4E-02  | 14           |
| Cellular Assembly and Organization                                 | 6,62E-04-1,33E-02 | 30           |
| Hair and Skin Development and Function                             | 6,62E-04-9,28E-03 | 6            |
| Hepatic System Development and Function                            | 6,62E-04-9,28E-03 | 6            |
| Gene Expression                                                    | 8,63E-04-6,29E-03 | 27           |
| Embryonic Development                                              | 9,95E-04-1,4E-02  | 21           |
| Nervous System Development and Function                            | 9,95E-04-1,28E-02 | 28           |
| Cell Cycle                                                         | 1,27E-03-1,51E-02 | 41           |
| Molecular Transport                                                | 1,95E-03-1,35E-02 | 27           |
| Respiratory System Development and Function                        | 1,95E-03-6,29E-03 | 11           |
| Small Molecule Biochemistry                                        | 1,95E-03-1,35E-02 | 33           |
| Cellular Function and Maintenance                                  | 2,48E-03-1,46E-02 | 14           |
| DNA Replication, Recombination, and Repair                         | 2,82E-03-2,82E-03 | 19           |
| Cellular Compromise                                                | 3,84E-03-1,27E-02 | 8            |
| Lipid Metabolism                                                   | 5,03E-03-1,35E-02 | 24           |
| Carbohydrate Metabolism                                            | 6,29E-03-1,49E-02 | 1            |
| Drug Metabolism                                                    | 6,29E-03-6,99E-03 | 6            |

|                                                                        |                   |     |
|------------------------------------------------------------------------|-------------------|-----|
| Hematological System Development and Function                          | 8,58E-03-8,58E-03 | 6   |
| Immune and Lymphatic System Development and Function                   | 8,58E-03-8,58E-03 | 6   |
| <b>IPA Biofunction in the [C vs. IC] profiles -IVF-ET pregnancies-</b> |                   |     |
| Cellular Growth and Proliferation                                      | 1,07E-09-5,26E-03 | 163 |
| Cell Death                                                             | 2,33E-09-5,45E-03 | 136 |
| Tissue Development                                                     | 3,09E-08-5,22E-03 | 99  |
| Cellular Movement                                                      | 4,44E-08-3,98E-03 | 94  |
| Cardiovascular System Development and Function                         | 4,61E-07-4,81E-03 | 64  |
| Organ Development                                                      | 4,61E-07-6,03E-04 | 57  |
| Organismal Development                                                 | 1,11E-06-4,81E-03 | 78  |
| Embryonic Development                                                  | 1,2E-06-4,63E-03  | 32  |
| Connective Tissue Development and Function                             | 2,25E-06-4,34E-03 | 41  |
| Skeletal and Muscular System Development and Function                  | 2,25E-06-5,22E-03 | 73  |
| Cellular Development                                                   | 4,6E-06-5,82E-03  | 105 |
| Cell Morphology                                                        | 2,63E-05-5,48E-03 | 94  |
| DNA Replication, Recombination, and Repair                             | 5,98E-05-5,98E-05 | 28  |
| Gene Expression                                                        | 8,71E-05-3,47E-03 | 83  |
| Organismal Survival                                                    | 9,22E-05-5,22E-03 | 50  |
| Cell Cycle                                                             | 1,16E-04-5,87E-03 | 59  |
| Cellular Assembly and Organization                                     | 1,7E-04-4,7E-03   | 41  |
| Cellular Function and Maintenance                                      | 1,81E-04-5,77E-03 | 30  |
| Tissue Morphology                                                      | 2,42E-04-5,9E-03  | 67  |
| Cellular Compromise                                                    | 3,78E-04-4,34E-03 | 9   |
| Organ Morphology                                                       | 5,79E-04-4,34E-03 | 26  |
| Tumor Morphology                                                       | 5,85E-04-5,1E-03  | 24  |
| Cell-To-Cell Signaling and Interaction                                 | 7,19E-04-5,77E-03 | 66  |
| Hair and Skin Development and Function                                 | 1,18E-03-5,26E-03 | 16  |
| Hepatic System Development and Function                                | 1,18E-03-3,23E-03 | 10  |
| Lipid Metabolism                                                       | 1,18E-03-5,45E-03 | 11  |
| Molecular Transport                                                    | 1,18E-03-5,45E-03 | 14  |
| Small Molecule Biochemistry                                            | 1,18E-03-5,45E-03 | 16  |
| Nervous System Development and Function                                | 1,28E-03-3,47E-03 | 7   |
| Free Radical Scavenging                                                | 1,37E-03-1,37E-03 | 8   |
| Hematological System Development and Function                          | 1,39E-03-5,9E-03  | 39  |
| Immune Response                                                        | 1,39E-03-3,47E-03 | 17  |
| Immune and Lymphatic System Development and Function                   | 1,68E-03-5,78E-03 | 21  |
| Cell Signaling                                                         | 2,61E-03-3,57E-03 | 6   |
| Vitamin and Mineral Metabolism                                         | 2,61E-03-3,57E-03 | 6   |
| Post-Translational Modification                                        | 3,07E-03-3,07E-03 | 23  |
| <b>IPA Biofunction in the [C vs. IC] profiles -SCNT pregnancies-</b>   |                   |     |
| Cellular Movement                                                      | 2,09E-08-1,23E-02 | 83  |
| Cellular Development                                                   | 2,34E-06-1,18E-02 | 90  |

|                                                       |                   |     |
|-------------------------------------------------------|-------------------|-----|
| Cellular Growth and Proliferation                     | 2,71E-06-1,37E-02 | 125 |
| Cardiovascular System Development and Function        | 2,75E-06-1,23E-02 | 48  |
| Organismal Development                                | 3,04E-06-1,26E-02 | 72  |
| Tumor Morphology                                      | 8,49E-06-1,18E-02 | 25  |
| Organ Development                                     | 3,14E-05-1,14E-02 | 48  |
| Embryonic Development                                 | 5,9E-05-1,05E-02  | 28  |
| Tissue Development                                    | 5,9E-05-1,11E-02  | 83  |
| Cell Death                                            | 5,93E-05-1,38E-02 | 100 |
| Skeletal and Muscular System Development and Function | 7,19E-05-1,11E-02 | 46  |
| Reproductive System Development and Function          | 2,55E-04-9,88E-03 | 10  |
| Cell-To-Cell Signaling and Interaction                | 4,37E-04-8,2E-03  | 57  |
| Connective Tissue Development and Function            | 4,37E-04-8,2E-03  | 37  |
| Organismal Survival                                   | 4,78E-04-1,14E-02 | 55  |
| Cell Cycle                                            | 5,63E-04-1,29E-02 | 46  |
| Cellular Compromise                                   | 7,48E-04-1,38E-02 | 13  |
| Cell Morphology                                       | 8,18E-04-1,14E-02 | 57  |
| Organ Morphology                                      | 8,18E-04-1,23E-02 | 26  |
| Tissue Morphology                                     | 8,18E-04-1,37E-02 | 54  |
| Lipid Metabolism                                      | 1,17E-03-1,26E-02 | 32  |
| Molecular Transport                                   | 1,17E-03-1,26E-02 | 27  |
| Small Molecule Biochemistry                           | 1,17E-03-1,26E-02 | 34  |
| Nervous System Development and Function               | 1,21E-03-8,2E-03  | 17  |
| Hematological System Development and Function         | 1,47E-03-1,37E-02 | 42  |
| Immune Response                                       | 1,47E-03-7,35E-03 | 32  |
| Immune and Lymphatic System Development and Function  | 1,47E-03-1,31E-02 | 33  |
| Gene Expression                                       | 1,72E-03-1E-02    | 59  |
| Visual System Development and Function                | 1,99E-03-8,92E-03 | 5   |
| Cellular Assembly and Organization                    | 2,41E-03-1,38E-02 | 33  |
| Respiratory System Development and Function           | 2,41E-03-2,74E-03 | 9   |
| DNA Replication, Recombination, and Repair            | 3,8E-03-8,25E-03  | 14  |
| Endocrine System Development and Function             | 4,28E-03-5,14E-03 | 6   |
| Renal and Urological System Development and Function  | 4,84E-03-4,84E-03 | 5   |
