# Supplementary material
Source: PubMed Central journal article supplement (PMC2667091)
Supplement: 0812722106_ST7_PDF.pdf [file 0812722106_ST7_PDF.pdf]

**Table S7.** Most significant IPA Canonical Pathways ( $P < 0.05$ ) for the C vs. IC profiles in AI, IVF-ET, and SCNT pregnancies

| Pathway                                                                       | P-value  | Nb. of genes |
|-------------------------------------------------------------------------------|----------|--------------|
| <b>IPA Canonical pathway for the [C vs. IC] profiles -AI pregnancies-</b>     |          |              |
| Dopamine Receptor Signaling                                                   | 6.11E-04 | 8            |
| Hepatic Fibrosis / Hepatic Stellate Cell Activation                           | 1.13E-03 | 10           |
| Complement System                                                             | 1.44E-03 | 5            |
| IGF-1 Signaling                                                               | 6.26E-03 | 7            |
| Wnt/ $\beta$ -catenin Signaling                                               | 7.79E-03 | 10           |
| Glycolysis/Gluconeogenesis                                                    | 1.13E-02 | 7            |
| VDR/RXR Activation                                                            | 1.43E-02 | 6            |
| Pentose Phosphate Pathway                                                     | 1.60E-02 | 4            |
| Acute Phase Response Signaling                                                | 2.44E-02 | 9            |
| Synaptic Long Term Depression                                                 | 2.54E-02 | 8            |
| Chemokine Signaling                                                           | 3.60E-02 | 5            |
| <b>IPA Canonical pathway for the [C vs. IC] profiles -IVF-ET pregnancies-</b> |          |              |
| Hepatic Fibrosis / Hepatic Stellate Cell Activation                           | 1.69E-05 | 15           |
| IGF-1 Signaling                                                               | 2.55E-03 | 9            |
| PI3K/AKT Signaling                                                            | 1.15E-02 | 9            |
| Dopamine Receptor Signaling                                                   | 1.36E-02 | 7            |
| VDR/RXR Activation                                                            | 1.66E-02 | 7            |
| Wnt/beta-catenin Signaling                                                    | 2.08E-02 | 11           |
| VEGF Signaling                                                                | 2.14E-02 | 7            |
| Complement System                                                             | 2.58E-02 | 4            |
| PTEN Signaling                                                                | 2.71E-02 | 7            |
| Nitric Oxide Signaling in the Cardiovascular System                           | 2.75E-02 | 6            |
| Glutathione Metabolism                                                        | 2.75E-02 | 6            |
| p53 Signaling                                                                 | 3.02E-02 | 7            |
| Tight Junction Signaling                                                      | 3.20E-02 | 10           |
| <b>IPA Canonical pathway for the [C vs. IC] profiles -SCNT pregnancies-</b>   |          |              |
| Wnt/beta-catenin Signaling                                                    | 6.31E-03 | 11           |
| Hepatic Fibrosis / Hepatic Stellate Cell Activation                           | 9.72E-03 | 9            |
| Neuregulin Signaling                                                          | 1.15E-02 | 7            |
| IGF-1 Signaling                                                               | 1.15E-02 | 7            |
| Complement System                                                             | 1.41E-02 | 4            |
| VDR/RXR Activation                                                            | 2.28E-02 | 6            |
