# Supplementary material
Source: PubMed Central journal article supplement (PMC2667091)
Supplement: 0812722106_ST8_PDF.pdf [file 0812722106_ST8_PDF.pdf]

**Table S8.** Description of the primers used for gene quantification by real time RT-PCR

| <b>Gene symbol</b> | <b>Primer name</b> | <b>Primer Sequence</b>        | <b>Fragment size</b> |
|--------------------|--------------------|-------------------------------|----------------------|
| <i>C11ORF34</i>    | C11ORF34.F         | CACTAGCCTCCCCAAGCCAA          | 123bp                |
|                    | C11ORF34.R         | CAGGATCTGGATGGCCTCTCT         |                      |
| <i>CALBINDIN3</i>  | CALB3.F            | GGAATTCCCCAGTTTGCTGA          | 121bp                |
|                    | CALB3.R            | CAGAGTAGGACCACATCCCAGG        |                      |
| <i>DECORIN</i>     | DECORIN.F          | TTTCAGCCTAATGACAGTCACAGAG     | 121bp                |
|                    | DECORIN.R          | CCACTGGAGCCCTCAAAGCT          |                      |
| <i>GJA1</i>        | Cx43.F             | GAGTAACCAGCAACTTTGATGTTTG     | 61 bp                |
|                    | Cx43.R             | TTCAACCTCTCTTGCATTCCAGA       |                      |
| <i>EPAS1</i>       | EPAS1.F            | CGCCCAAATTGTCCTTTAGC          | 121bp                |
|                    | EPAS1.R            | ATGCCCTTAATGCTGAGGCA          |                      |
| <i>FABP3</i>       | FABP3.F            | GAGATCAGCTTCAAGCTGGGA         | 121bp                |
|                    | FABP3.R            | CTTGTCCATTCCACTTCTGCAC        |                      |
| <i>FBP1</i>        | FBP1.F             | GGTACGTGGGCTCCATGGTA          | 121bp                |
|                    | FBP1.R             | GGGTTACATTACATACAGTAGTCTCAGCT |                      |
| <i>JSP.1</i>       | JSP1.F             | TAGGAGTTAGGGAGACTGGCCC        | 121bp                |
|                    | JSP1.R             | AGCCTCGTCTCTGCTGGAAC          |                      |
| <i>LGALS1</i>      | LGALS1.F           | CCCTTCAGCCTGGAAGTGT           | 123bp                |
|                    | LGALS1.R           | TGATGGCCTCCAGGTTGAG           |                      |
| <i>MSX1</i>        | MSX1.F             | GTTTCGCTCAGCCTCACCGAG         | 122bp                |
|                    | MSX1.R             | GGCAACATGGGTTTAGCGG           |                      |
| <i>MX2</i>         | MX2.F              | CAGAGACGCCTCAGTCGAAGC         | 122bp                |
|                    | MX2.R              | TGATTGGCGAGACGTTTGCT          |                      |
| <i>NPY</i>         | NPY.F              | TGGTGATGGGAAATGAACTTG         | 121bp                |
|                    | NPY.R              | TGCAGAGGTGAGCACAGGG           |                      |
| <i>PLAC8</i>       | PLAC8.F            | CAGCTTTTCCACTTTCTGCAACT       | 123bp                |
|                    | PLAC8.R            | GGACCATTTAGCAAACTAAGGGA       |                      |
| <i>PTN</i>         | PTN.F              | GTTGAAAGGGAGACTGGAGAAGG       | 71bp                 |
|                    | PTN.R              | AATCTGAAAGCACCATGGCATA        |                      |
| <i>RSAD2</i>       | RSAD2.F            | TCCATTGCCTGGGAAGTAATA         | 121bp                |
|                    | RSAD2.R            | CCATCTAGTGGCCAAAACGG          |                      |
